# Supplementary material for: Effect of Plant Protein on Blood Lipids: A Systematic Review and Meta‐Analysis of Randomized Controlled Trials
Source: PubMed Central journal article supplement — J Am Heart Assoc. 2017 Dec 20;6(12):e006659. doi: 10.1161/JAHA.117.006659 (PMC5779002; doi:10.1161/jaha.117.006659), 2017-12-20
Supplement: JAH3-6-e006659-s001.pdf [file JAH3-6-e006659-s001.pdf]

# **SUPPLEMENTAL MATERIAL**

**Table S1. Search Strategy.**

|     | <b>Medline</b>                                                                                                                                                                                                                                                                                                                                                                                                                                                                                                                                                                                                                                                                                                                               | <b>EMBASE</b>                                                                                                                                                                                                                                                                                                                                                                                                                                                                                                                                                                                                                                                                              | <b>Cochrane</b>                                                                                                                                                                                                                                                                                                                                                                                                                                                                                                                                                                                                                                                                                                                              |
|-----|----------------------------------------------------------------------------------------------------------------------------------------------------------------------------------------------------------------------------------------------------------------------------------------------------------------------------------------------------------------------------------------------------------------------------------------------------------------------------------------------------------------------------------------------------------------------------------------------------------------------------------------------------------------------------------------------------------------------------------------------|--------------------------------------------------------------------------------------------------------------------------------------------------------------------------------------------------------------------------------------------------------------------------------------------------------------------------------------------------------------------------------------------------------------------------------------------------------------------------------------------------------------------------------------------------------------------------------------------------------------------------------------------------------------------------------------------|----------------------------------------------------------------------------------------------------------------------------------------------------------------------------------------------------------------------------------------------------------------------------------------------------------------------------------------------------------------------------------------------------------------------------------------------------------------------------------------------------------------------------------------------------------------------------------------------------------------------------------------------------------------------------------------------------------------------------------------------|
| 1   | (Exp diet, vegetarian/ OR vegetarian*.mp. OR vegan*.mp. OR exp vegetable proteins/ OR (vegetable* adj1 protein*).mp. OR (plant* adj1 protein*).mp. OR (plant* adj1 food*).mp. OR (plant* adj1 based).mp. OR exp Fabaceae/ OR exp soybean proteins/ OR soy*.mp. OR tofu*.mp. OR natto*.mp. OR tempeh*.mp. OR miso*.mp. OR lentil*.mp. OR bean*.mp. OR legume*.mp. OR (meat* adj1 analog*).mp.) OR lactoovo*.mp. OR lacto-ovo*.mp. OR ovolacto*.mp. OR ovo-lacto*.mp. OR lactoveg*.mp. OR lacto-veg*.mp. OR ovoveg*.mp. OR ovo-veg*.mp.)                                                                                                                                                                                                       | (Exp vegetarian diet/ OR exp vegetarian/ OR vegetarian*.mp. OR vegan*.mp. OR exp vegetable protein/ OR (vegetable* adj1 protein*).mp. OR (plant* adj1 protein*).mp. OR (plant* adj1 food*).mp. OR (plant* adj1 based).mp. OR exp Fabaceae/ OR soy*.mp. OR tofu*.mp. OR natto*.mp. OR tempeh*.mp. OR miso*.mp. OR lentil*.mp. OR bean*.mp. OR legume*.mp. OR (meat* adj1 analog*).mp. OR lactoovo*.mp. OR lacto-ovo*.mp. OR ovolacto*.mp. OR ovo-lacto*.mp. OR lactoveg*.mp. OR lacto-veg*.mp. OR ovoveg*.mp. OR ovo-veg*.mp.)                                                                                                                                                              | (Exp diet, vegetarian/ OR vegetarian*.mp. OR vegan*.mp. OR exp vegetable proteins/ OR (vegetable* adj1 protein*).mp. OR (plant* adj1 protein*).mp. OR (plant* adj1 food*).mp. OR (plant* adj1 based).mp. OR exp Fabaceae/ OR exp soybean proteins/ OR soy*.mp. OR tofu*.mp. OR natto*.mp. OR tempeh*.mp. OR miso*.mp. OR lentil*.mp. OR bean*.mp. OR legume*.mp. OR (meat* adj1 analog*).mp.) OR lactoovo*.mp. OR lacto-ovo*.mp. OR ovolacto*.mp. OR ovo-lacto*.mp. OR lactoveg*.mp. OR lacto-veg*.mp. OR ovoveg*.mp. OR ovo-veg*.mp.)                                                                                                                                                                                                       |
| AND |                                                                                                                                                                                                                                                                                                                                                                                                                                                                                                                                                                                                                                                                                                                                              |                                                                                                                                                                                                                                                                                                                                                                                                                                                                                                                                                                                                                                                                                            |                                                                                                                                                                                                                                                                                                                                                                                                                                                                                                                                                                                                                                                                                                                                              |
|     | (omnivor*.mp. OR (conventional adj3 diet*).mp. OR (normal adj3 diet*).mp. OR (regular adj3 diet*).mp. OR (mixed adj3 diet*).mp. OR exp egg proteins, dietary/ OR exp milk proteins/ OR exp meat/ OR exp eggS/ OR exp dairy products/ OR exp milk/ OR (meat* adj1 protein*).mp. OR (meat* adj1 product*).mp. OR (animal* adj1 protein*).mp. OR (animal* adj1 product*).mp. OR (fish* adj1 protein*).mp. OR (fish* adj1 product*).mp. OR (poultry adj1 protein*).mp. OR (poultry adj1 product*).mp. OR (chicken* adj1 protein*).mp. OR (chicken* adj1 product*).mp. OR (egg* adj1 protein*).mp. OR (egg* adj1 product*).mp. OR (milk adj1 protein*).mp. OR (milk adj1 product*).mp. OR (dairy adj1 protein*).mp. OR (dairy adj1 product*).mp.) | (exp omnivore/ OR omnivor*.mp. OR (conventional adj3 diet*).mp. OR (normal adj3 diet*).mp. OR (regular adj3 diet*).mp. OR (mixed adj3 diet*).mp. OR exp Meat/ OR exp egg/ OR exp dairy product/ OR (meat* adj1 protein*).mp. OR (meat* adj1 product*).mp. OR (animal* adj1 protein*).mp. OR (animal* adj1 product*).mp. OR (fish* adj1 protein*).mp. OR (fish* adj1 product*).mp. OR (poultry adj1 protein*).mp. OR (poultry adj1 product*).mp. OR (chicken* adj1 protein*).mp. OR (chicken* adj1 product*).mp. OR (egg* adj1 protein*).mp. OR (egg* adj1 product*).mp. OR (milk adj1 protein*).mp. OR (milk adj1 product*).mp. OR (dairy adj1 protein*).mp. OR (dairy adj1 product*).mp.) | (omnivor*.mp. OR (conventional adj3 diet*).mp. OR (normal adj3 diet*).mp. OR (regular adj3 diet*).mp. OR (mixed adj3 diet*).mp. OR exp egg proteins, dietary/ OR exp milk proteins/ OR exp meat/ OR exp eggS/ OR exp dairy products/ OR exp milk/ OR (meat* adj1 protein*).mp. OR (meat* adj1 product*).mp. OR (animal* adj1 protein*).mp. OR (animal* adj1 product*).mp. OR (fish* adj1 protein*).mp. OR (fish* adj1 product*).mp. OR (poultry adj1 protein*).mp. OR (poultry adj1 product*).mp. OR (chicken* adj1 protein*).mp. OR (chicken* adj1 product*).mp. OR (egg* adj1 protein*).mp. OR (egg* adj1 product*).mp. OR (milk adj1 protein*).mp. OR (milk adj1 product*).mp. OR (dairy adj1 protein*).mp. OR (dairy adj1 product*).mp.) |
| AND |                                                                                                                                                                                                                                                                                                                                                                                                                                                                                                                                                                                                                                                                                                                                              |                                                                                                                                                                                                                                                                                                                                                                                                                                                                                                                                                                                                                                                                                            |                                                                                                                                                                                                                                                                                                                                                                                                                                                                                                                                                                                                                                                                                                                                              |
|     | (exp lipoproteins/ OR exp cholesterol/ OR exp hyperlipidemias/ OR (lipid or lipids).mp. OR (cholesterol or cholesterols).mp. OR hdl.mp. OR ("high density lipoprotein" or "high density lipoproteins").mp. OR ldl.mp. OR ("low density lipoprotein" or "low density lipoproteins").mp. OR apolipoprotein*.mp. OR (hyperlipemia* or hyperlipaemia*).mp. OR (hyperlipidemia* or hyperlipidaemia*).mp. OR (lipidemia* or lipidaemia*).mp. OR (lipemia* or lipaemia*).mp. OR (lipemic or lipaemic).mp.)                                                                                                                                                                                                                                          | (exp lipoproteins/ OR exp cholesterol/ OR exp hyperlipidemias/ OR (lipid or lipids).mp. OR (cholesterol or cholesterols).mp. OR hdl.mp. OR ("high density lipoprotein" or "high density lipoproteins").mp. OR ldl.mp. OR ("low density lipoprotein" or "low density lipoproteins").mp. OR apolipoprotein*.mp. OR (hyperlipemia* or hyperlipaemia*).mp. OR (hyperlipidemia* or hyperlipidaemia*).mp. OR (lipidemia* or lipidaemia*).mp. OR (lipemia* or lipaemia*).mp. OR (lipemic or lipaemic).mp.)                                                                                                                                                                                        | (exp lipoproteins/ OR exp cholesterol/ OR exp hyperlipidemias/ OR (lipid or lipids).mp. OR (cholesterol or cholesterols).mp. OR hdl.mp. OR ("high density lipoprotein" or "high density lipoproteins").mp. OR ldl.mp. OR ("low density lipoprotein" or "low density lipoproteins").mp. OR apolipoprotein*.mp. OR (hyperlipemia* or hyperlipaemia*).mp. OR (hyperlipidemia* or hyperlipidaemia*).mp. OR (lipidemia* or lipidaemia*).mp. OR (lipemia* or lipaemia*).mp. OR (lipemic or lipaemic).mp.)                                                                                                                                                                                                                                          |
| 2   | limit 1 to animals                                                                                                                                                                                                                                                                                                                                                                                                                                                                                                                                                                                                                                                                                                                           | limit 1 to animals                                                                                                                                                                                                                                                                                                                                                                                                                                                                                                                                                                                                                                                                         | 1 not (exp infant formula/ OR exp milk, human/)                                                                                                                                                                                                                                                                                                                                                                                                                                                                                                                                                                                                                                                                                              |
| 3   | limit 2 to human                                                                                                                                                                                                                                                                                                                                                                                                                                                                                                                                                                                                                                                                                                                             | limit 2 to human                                                                                                                                                                                                                                                                                                                                                                                                                                                                                                                                                                                                                                                                           |                                                                                                                                                                                                                                                                                                                                                                                                                                                                                                                                                                                                                                                                                                                                              |
| 4   | 2 not 3                                                                                                                                                                                                                                                                                                                                                                                                                                                                                                                                                                                                                                                                                                                                      | 2 not 3                                                                                                                                                                                                                                                                                                                                                                                                                                                                                                                                                                                                                                                                                    |                                                                                                                                                                                                                                                                                                                                                                                                                                                                                                                                                                                                                                                                                                                                              |
| 5   | 1 not 4                                                                                                                                                                                                                                                                                                                                                                                                                                                                                                                                                                                                                                                                                                                                      | 1 not 4                                                                                                                                                                                                                                                                                                                                                                                                                                                                                                                                                                                                                                                                                    |                                                                                                                                                                                                                                                                                                                                                                                                                                                                                                                                                                                                                                                                                                                                              |
| 6   | 5 not (exp infant formula/ OR exp milk, human/)                                                                                                                                                                                                                                                                                                                                                                                                                                                                                                                                                                                                                                                                                              | 5 not (exp breast milk/ or exp infant formula/)                                                                                                                                                                                                                                                                                                                                                                                                                                                                                                                                                                                                                                            |                                                                                                                                                                                                                                                                                                                                                                                                                                                                                                                                                                                                                                                                                                                                              |

For all databases, the original search date was December 6, 2016; updated search was performed on September 10, 2017.

**Table S2.** Full Table of Characteristics.

| Study, year                                    | Participants         | Mean Age (SD or range), y * | Mean BMI or Body Weight (SD) † | Setting       | Design | Plant Protein Source | Animal Protein Source ‡ | Food Form §     | Amount of substitution  | Background Diet ¶           | Energy Balance | Follow-up | Funding #         |
|------------------------------------------------|----------------------|-----------------------------|--------------------------------|---------------|--------|----------------------|-------------------------|-----------------|-------------------------|-----------------------------|----------------|-----------|-------------------|
| Abd-Mishani et al. 2014 <sup>(1)</sup>         | 24 DM2 (6M,18W)      | 61.7 (6)                    | 74.5 (7.1) kg                  | OP, Iran      | C      | Pulses               | Meat                    | Whole           | 2 servings pulses 3d/wk | (55:30:15)                  | Neutral        | 8 wks     | Agency            |
| Abete et al. 2009 <sup>(2)**</sup>             | 26 O (26M)           | 38 (35.7)                   | 31.8 (3) kg/m <sup>2</sup>     | OP, Spain     | P      | Legumes              | Meat, Fatty fish        | Whole           | Legumes 4d/wk           | (53:30:17)                  | Negative       | 8 wks     | Agency            |
| Ahmed et al. 2011 <sup>(3)</sup>               | 27 CKD (4M,23W)      | 46 (12)                     | 25.6 (4.6) kg/m <sup>2</sup>   | OP, Brazil    | P      | Soy                  | Various                 | Protein         | 0.8g/kg                 | Nephropathy diet            | Negative       | 8 wks     | N/A               |
| Allen et al. 2007 <sup>(4)**</sup>             | 191 PM (191W)        | 56.8 (5.6)                  | 27.9 (4.7) kg/m <sup>2</sup>   | OP, USA       | P      | Soy                  | Dairy                   | Protein         | 20g                     | LF                          | Neutral        | 12 wks    | Agency & Industry |
| Appt et al. 2008 <sup>(5)</sup>                | 32 PM (32W)          | 57.7 (4.5)                  | 24.6 (3.2) kg/m <sup>2</sup>   | OP, USA       | C      | Soy                  | Dairy                   | Protein         | 52g                     | Habitual                    | Neutral        | 8 wks     | Agency & Industry |
| Ashton et al. 2000 <sup>(6)</sup>              | 42 N (42M)           | 45.8 (7.8)                  | 26.2 (3.3) kg/m <sup>2</sup>   | OP, Australia | C      | Soy                  | Lean meat               | Whole           | 290g tofu               | Plant-based diet (44:32:17) | Neutral        | 4 wks     | N/A               |
| Azadbakht et al. 2003 <sup>(7)</sup>           | 14 DM2,CKD (10M,4W)  | 62.5 (12.1)                 | 26.6 (4) kg/m <sup>2</sup>     | OP, Iran      | C      | Soy                  | Various                 | Protein         | 35%                     | Nephropathy diet            | Neutral        | 7 wks     | Agency            |
| Azadbakht et al. 2007 <sup>(8)</sup>           | 42 MS,PM (42W)       | PM                          | N/A                            | OP, Iran      | C      | Soy                  | Red meat                | Whole & protein | 11-15g                  | DASH                        | Neutral        | 8 wks     | Agency            |
| Azadbakht et al. 2008 <sup>(9)</sup>           | 41 DM2,CKD (18M,23W) | 62 (12)                     | N/A                            | OP, Iran      | P      | Soy                  | Various                 | Protein         | 35%                     | Nephropathy diet            | Neutral        | 4 y       | N/A               |
| Bahr et al. 2013 <sup>(10)</sup>               | 33 HC (15M,18W)      | 49.5 (13.4)                 | 28 (5.9) kg/m <sup>2</sup>     | OP, Germany   | C      | Lupin                | Dairy                   | Protein         | 20g                     | Habitual                    | Neutral        | 8 wks     | Agency & Industry |
| Bahr et al. 2014 <sup>(11)</sup>               | 68 HC (28M,40W)      | 56.9 (10.7)                 | 26.5 (2.7) kg/m <sup>2</sup>   | OP, Germany   | C      | Lupin                | Dairy                   | Protein         | 20g                     | Habitual                    | Neutral        | 4 wks     | Agency & Industry |
| Bakhit et al. 1994 <sup>(12)</sup> (Cotyledon) | 21 HC (21M)          | 43 (14)                     | 27.1 (3) kg/m <sup>2</sup>     | OP, USA       | C      | Soy                  | Dairy                   | Protein         | 25g                     | LF, LC (55:30:15)           | Neutral        | 4 wks     | Industry          |
| Bakhit et al. 1994 <sup>(12)</sup> (Cellulose) | 21 HC (21M)          | 43 (14)                     | 27.1 (3) kg/m <sup>2</sup>     | OP, USA       | C      | Soy                  | Dairy                   | Protein         | 25g                     | LF, LC (55:30:15)           | Neutral        | 4 wks     | Industry          |
| Basaria et al. 2009 <sup>(13)</sup>            | 84 PM (84W)          | 55.7 (10.8)                 | 26 (5.2) kg/m <sup>2</sup>     | OP, USA       | P      | Soy                  | Dairy                   | Protein         | 20g                     | Habitual                    | Neutral        | 12 wks    | N/A               |
| Baum et al. 1998 <sup>(14)</sup>               | 66 PM (66W)          | 60.9 (8)                    | 28.2 (5.3) kg/m <sup>2</sup>   | OP, USA       | P      | Soy                  | Dairy                   | Protein         | 40g                     | NCEP Step 1                 | Neutral        | 24 wks    | Agency & Industry |

**Table S2.** Full Table of Characteristics (Continued).

| Study, year                                 | Participants        | Mean Age (SD or range), y * | Mean BMI or Body Weight (SD) † | Setting    | Design | Plant Protein Source | Animal Protein Source ‡ | Food Form § | Amount of substitution | Background Diet ¶ | Energy Balance | Follow-up | Funding #         |
|---------------------------------------------|---------------------|-----------------------------|--------------------------------|------------|--------|----------------------|-------------------------|-------------|------------------------|-------------------|----------------|-----------|-------------------|
| Beavers et al. 2010 <sup>(15)</sup>         | 32 N,PM (32W)       | 54.4 (3.3)                  | 25.8 (3.8) kg/m <sup>2</sup>   | OP, USA    | P      | Soy                  | Dairy                   | Whole       | 18g                    | Habitual          | Neutral        | 4 wks     | Industry          |
| Blum et al. 2003 <sup>(16)</sup>            | 24 HC,PM (24W)      | 55 (5)                      | N/A                            | OP, Israel | C      | Soy                  | Dairy                   | Protein     | 25g                    | Habitual          | Neutral        | 6 wks     | Industry          |
| Borodin et al. 2009 <sup>(17)</sup>         | 28 HC,O (9M,19W)    | 50 (10.6)                   | 29 (3.9) kg/m <sup>2</sup>     | OP, Russia | C      | Soy                  | Dairy                   | Protein     | 30g                    | Habitual          | Neutral        | 2 mos     | Industry          |
| Bricarello et al. 2004 <sup>(18)</sup>      | 60 HC (15M,45W)     | 56 (7.7)                    | 24.9 (2.3) kg/m <sup>2</sup>   | OP, Brazil | C      | Soy                  | Dairy                   | Whole       | 25g                    | NCEP TLC          | Neutral        | 6 wks     | Agency & Industry |
| Burns-Whitmore et al. 2014 <sup>(19)</sup>  | 20 N (4M,16W)       | 38 (3)                      | 23 (4.5) kg/m <sup>2</sup>     | OP, USA    | C      | Walnut               | Egg (Standard, N3 FA)   | Whole       | 28g walnut 6x/wk       | Habitual          | Neutral        | 8 wks     | Agency & Industry |
| Campbell et al. 2010 <sup>(20)</sup>        | 62 HC,PM (62W)      | 54.3 (33.2)                 | 28 (5.2) kg/m <sup>2</sup>     | OP, USA    | P      | Soy                  | Dairy                   | Protein     | 25g                    | Habitual          | Neutral        | 1 y       | Agency & Industry |
| Chen et al. 2005 (HC) <sup>(21)</sup>       | 19 HC,CKD (5M,14W)  | 63.6 (9.4)                  | 24 (2.1) kg/m <sup>2</sup>     | OP, Taiwan | P      | Soy                  | Dairy                   | Protein     | 30g                    | Hemodialysis diet | Neutral        | 12 wks    | Agency & Industry |
| Chen et al. 2005 (N) <sup>(21)</sup>        | 18 CKD (5M,13W)     | 59.5 (11.9)                 | 21.3 (5) kg/m <sup>2</sup>     | OP, Taiwan | P      | Soy                  | Dairy                   | Protein     | 30g                    | Hemodialysis diet | Neutral        | 12 wks    | Agency & Industry |
| Chen et al. 2006 <sup>(22)</sup>            | 26 HC,CKD (19M,7W)  | 58.6 (11.4)                 | 23.1 (2.7) kg/m <sup>2</sup>   | OP, Taiwan | P      | Soy                  | Dairy                   | Protein     | 30g                    | Hemodialysis diet | Neutral        | 12 wks    | Agency            |
| Crouse et al. 1999 <sup>(23)*</sup>         | 146 HC (94M,62W)    | 52 (11)                     | 26 (3) kg/m <sup>2</sup>       | OP, USA    | P      | Soy                  | Dairy                   | Protein     | 25g                    | NCEP Step 1       | Neutral        | 9 wks     | Agency & Industry |
| Cuevas et al. 2003 <sup>(24)</sup>          | 18 HC,PM (18W)      | 59 (47-70)                  | 29.3 (3.4) kg/m <sup>2</sup>   | OP, Chile  | C      | Soy                  | Dairy                   | Protein     | 40g                    | NCEP Step 1       | N/A            | 4 wks     | Agency & Industry |
| Dent et al. 2001 <sup>(25)</sup>            | 69 PeriM (69W)      | 50.2 (3.6)                  | 24.1 (3.2) kg/m <sup>2</sup>   | OP, USA    | P      | Soy                  | Dairy                   | Protein     | 40g                    | Habitual          | Neutral        | 24 wks    | Agency & Industry |
| Duane et al. 1999 <sup>(26)</sup>           | 8 N (8M)            | 60.3 (11.9)                 | 26.3 (4) kg/m <sup>2</sup>     | IP, USA    | C      | Soy                  | Various                 | Whole       | >75%                   | American diet     | Neutral        | 6-7 wks   | Agency            |
| Dunn et al. 1986 <sup>(27)</sup>            | 12 N (12M)          | 31.8 (6.4)                  | 24.9 (4.6) kg/m <sup>2</sup>   | OP, USA    | C      | Soy                  | Dairy                   | Whole       | 26.7g                  | Habitual          | Neutral        | 3 wks     | N/A               |
| Finley et al. 2007 (N) <sup>(28)</sup>      | 40 N (20M,20W)      | 37.4 (10.1)                 | 24.5 (2.8) kg/m <sup>2</sup>   | OP, USA    | P      | Pinto beans          | Chicken noodle soup     | Whole       | 130g pinto beans       | Habitual          | Neutral        | 12 wks    | Agency            |
| Finley et al. 2007 (Pre-MS) <sup>(28)</sup> | 40 Pre-MS (20M,20W) | 42.4 (9.9)                  | 32.8 (3.8) kg/m <sup>2</sup>   | OP, USA    | P      | Pinto beans          | Chicken noodle soup     | Whole       | 130g pinto beans       | Habitual          | Neutral        | 12 wks    | Agency            |

**Table S2.** Full Table of Characteristics (Continued).

| Study, year                                                             | Participants      | Mean Age (SD or range), y * | Mean BMI or Body Weight (SD) † | Setting     | Design | Plant Protein Source | Animal Protein Source ‡ | Food Form §     | Amount of substitution   | Background Diet ¶  | Energy Balance               | Follow-up | Funding #         |
|-------------------------------------------------------------------------|-------------------|-----------------------------|--------------------------------|-------------|--------|----------------------|-------------------------|-----------------|--------------------------|--------------------|------------------------------|-----------|-------------------|
| Gardner et al. 2001 <sup>(29)</sup>                                     | 94 HC,PM (94W)    | 59.1 (6.9)                  | 26.3 (4.4) kg/m <sup>2</sup>   | OP, USA     | P      | Soy                  | Dairy                   | Protein         | 42g                      | Habitual           | Neutral                      | 12 wks    | Agency & Industry |
| Gardner et al. 2007 <sup>(30)</sup>                                     | 28 HC (6M,22W)    | 52 (9)                      | 26 (4) kg/m <sup>2</sup>       | OP, USA     | C      | Soy                  | Dairy                   | Whole & protein | 25g                      | Habitual           | Positive                     | 4 wks     | Agency & Industry |
| Giovannetti et al. 1986 <sup>(31)</sup> (N)                             | 12 N (12W)        | 22.1 (2.1)                  | 59.5 (8) kg                    | OP, Canada  | C      | Soy                  | Dairy                   | Protein         | 88%                      | (44:38:18)         | Neutral                      | 4 wks     | Agency & Industry |
| Giovannetti et al. 1986 <sup>(31)</sup> (LF)                            | 12 N (12W)        | 22.1 (2.1)                  | 59.5 (8) kg                    | OP, Canada  | C      | Soy                  | Dairy & meat            | Protein         | 88%                      | (59:23:18)         | Neutral                      | 4 wks     | Agency & Industry |
| Goldberg et al. 1982 <sup>(32)</sup> (N)                                | 4 N (3M,1W)       | 36.8 (16.1)                 | N/A                            | OP, USA     | C      | Soy                  | Dairy & meat            | Protein         | 75%                      | (40:40:20)         | Neutral                      | 6 wks     | Agency & Industry |
| Goldberg et al. 1982 <sup>(32)</sup> (HC)                               | 12 HC (7M,5W)     | 43.6 (12.2)                 | N/A                            | OP, USA     | C      | Soy                  | Dairy & meat            | Protein         | 75%                      | (40:40:20)         | Neutral                      | 6 wks     | Agency & Industry |
| Greany et al. 2004 <sup>(33)</sup>                                      | 37 PM (37W)       | 57.5 (13.4)                 | 25.4 (6.7) kg/m <sup>2</sup>   | OP, USA     | C      | Soy                  | Dairy                   | Protein         | 0.4g/kg                  | Habitual           | Neutral                      | 6 wks     | Agency & Industry |
| Haub et al. 2005 <sup>(34)</sup>                                        | 21 N (21M)        | 65 (5)                      | 28.2 (2.6) kg/m <sup>2</sup>   | OP, USA     | P      | Soy                  | Beef products           | Whole           | 0.6g/kg                  | Plant-based diet   | Neutral                      | 12 wks    | Agency & Industry |
| Hermansen et al. 2001 <sup>(35)</sup>                                   | 20 DM2 (14M,6W)   | 63.6 (7.5)                  | 30.2 (4.1) kg/m <sup>2</sup>   | OP, Denmark | C      | Soy                  | Dairy                   | Protein         | 50g                      | (~42:29:26)        | Neutral                      | 6 wks     | Agency & Industry |
| Hill et al. 2015 <sup>(36)</sup> ††                                     | 62 O,MS (28M,34W) | 45.8 (21.4)                 | 34.8 (3.7) kg/m <sup>2</sup>   | OP, USA     | P      | Lean beef            | Various                 | Whole           | 67%                      | DASH or (45:27:27) | Neutral 5 wk, Negative 18 wk | 6 mos     | Agency & Industry |
| Hoie et al. 2005 <sup>(37)</sup> - A double-blind placebo-controlled... | 116 HC (54M,62W)  | 55.2 (9.5)                  | 76.9 (12.4) kg                 | OP, Germany | P      | Soy                  | Dairy                   | Protein         | 25g                      | Habitual           | Neutral                      | 8 wks     | N/A               |
| Hoie et al. 2005 <sup>(38)</sup> - Lipid Lowering...                    | 117 HC (63M,54W)  | 53.6 (9.6)                  | 76.3 (12.5) kg                 | OP, Germany | P      | Soy                  | Dairy                   | Protein         | 15g, 25g                 | Habitual           | Neutral                      | 8 wks     | N/A               |
| Hoie et al. 2007 <sup>(39)</sup>                                        | 88 HC (34M,54W)   | 54.6 (9.6)                  | 75.2 (12.5) kg                 | OP, Germany | P      | Soy                  | Dairy                   | Protein         | 25g                      | Habitual           | Neutral                      | 8 wks     | Industry          |
| Hosseinpour-Niazi et al. 2014 <sup>(40)</sup>                           | 31 DM2 (7M,24W)   | 58.1 (33.4)                 | 27.8 (3.3) kg/m <sup>2</sup>   | OP, Iran    | C      | Non-soy legumes      | Meat                    | Whole           | 2 servings legumes 3x/wk | NCEP TLC           | Neutral                      | 8 wks     | Agency            |

**Table S2.** Full Table of Characteristics (Continued).

| Study, year                                     | Participants          | Mean Age (SD or range), y * | Mean BMI or Body Weight (SD) † | Setting         | Design | Plant Protein Source | Animal Protein Source ‡ | Food Form §     | Amount of substitution | Background Diet ¶        | Energy Balance | Follow-up | Funding #         |
|-------------------------------------------------|-----------------------|-----------------------------|--------------------------------|-----------------|--------|----------------------|-------------------------|-----------------|------------------------|--------------------------|----------------|-----------|-------------------|
| Huff et al. 1984 <sup>(41)</sup>                | 5 HC (5M)             | 49 (11.2)                   | 82 (15.7) kg                   | OP, Canada      | C      | Soy                  | Various                 | Whole           | 41g                    | (49:37:15)               | Negative       | 6 wks     | Agency            |
| Jenkins et al. 1989 <sup>(42)</sup>             | 11 O (11W)            | 38 (13.3)                   | 32.8 (4.1) kg/m <sup>2</sup>   | OP, Canada      | C      | Soy                  | Various                 | Protein         | 17.4g                  | 1000kcal diet            | Negative       | 4 wks     | Agency & Industry |
| Jenkins et al. 2002 <sup>(43)</sup>             | 41 HC,PM (23M,18W)    | 62 (12.8)                   | 25.3 (3.2) kg/m <sup>2</sup>   | OP, Canada      | C      | Soy                  | Dairy                   | Whole & protein | 50-52g                 | NCEP Step 2              | Neutral        | 4 wks     | Agency & Industry |
| Jenkins et al. 2010 <sup>(44)</sup>             | 23 HC,PM (7M,16W)     | 57 (9.6)                    | 26 (4.8) kg/m <sup>2</sup>     | OP, Canada      | C      | Barley               | Dairy                   | Whole           | 30g/2000kcal           | LF, LC, plant-based diet | Neutral        | 4 wks     | Agency & Industry |
| Kestin et al. 1989 <sup>(45)</sup>              | 26 N (26M)            | 44 (10)                     | 25.5 (3.2)                     | OP, Australia   | P §§   | Various              | Meat                    | Whole           | 60%                    | Plant-based diet         | Neutral        | 6 wks     | Agency & Industry |
| Kjølbaek et al. 2017 <sup>(46)</sup>            | 113 O (60M:91F)       | 42.4                        | 33.1                           | OP, Denmark     | P      | Soy                  | Dairy                   | Protein         | 45g                    | Habitual                 | Neutral        | 24 wks    | Agency & Industry |
| Kreijkamp-Kaspers et al. 2004 <sup>(47)</sup>   | 175 PM (175W)         | 66.6 (4.7)                  | 26.2 (3.8) kg/m <sup>2</sup>   | OP, Netherlands | P      | Soy                  | Dairy                   | Protein         | 25.6g                  | Habitual                 | Neutral        | 1 y       | Agency & Industry |
| Kurowska et al. 1997 <sup>(48)</sup>            | 34 HC (17M,17W)       | 55 (11)                     | N/A                            | OP, Canada      | C      | Soy                  | Dairy                   | Whole           | 31g                    | Habitual                 | Neutral        | 4 wks     | Industry          |
| Laidlaw et al. 1985 <sup>(49)</sup>             | 19 HC (19M)           | 47.4 (11.3)                 | 81.5 (11.7) kg                 | OP, Canada      | C      | Soy                  | Dairy                   | Protein         | 18.4g                  | Habitual                 | Neutral        | 8 wks     | Agency & Industry |
| Laurin et al. 1991 <sup>(50)**</sup>            | 9 FHC (6M,4W)         | 8 (3)                       | 16.7 (2.6) kg/m <sup>2</sup>   | OP, Canada      | C      | Soy                  | Dairy                   | Protein         | 35%                    | LC (52:28:20)            | Neutral        | 4 wks     | Agency            |
| Li et al. 2016 <sup>(51)</sup>                  | 34 O (11M:23F)        | 53.5 (3.2)                  | 30.9 (0.7) kg/m <sup>2</sup>   | OP, USA         | P      | Legumes              | Meat                    | Whole           | 30%                    | (55:25:20)               | Negative       | 12 wks    | Agency & Industry |
| Liao et al. 2007 <sup>(52)</sup>                | 30 O (6M,24W)         | 33.4 (10.8)                 | 29.8 (3.4) kg/m <sup>2</sup>   | OP, Taiwan      | P      | Soy                  | Various                 | Whole           | 30g                    | (60:25:15)               | Negative       | 8 wks     | Industry          |
| Lichenstein et al. 2002 <sup>(53)</sup> (No IF) | 42 HC (18M,24W)       | 62.7 (8.8)                  | 26.6 (3.4) kg/m <sup>2</sup>   | OP, USA         | C      | Soy                  | Dairy & meat            | Protein         | 50g/2000kcal           | (46.5:37:16)             | Neutral        | 6 wks     | Agency & Industry |
| Lichenstein et al. 2002 <sup>(53)</sup> (IF)    | 42 HC (18M,24W)       | 62.7 (8.8)                  | 26.6 (3.4) kg/m <sup>2</sup>   | OP, USA         | C      | Soy                  | Dairy & meat            | Protein         | 50g/2000kcal           | (46.5:37:16)             | Neutral        | 6 wks     | Agency & Industry |
| Liu et al. 2012 <sup>(54)</sup>                 | 180 Pre-DM2,PM (180W) | 56.2 (4.4)                  | 24.4 (3.7) kg/m <sup>2</sup>   | OP, China       | P      | Soy                  | Dairy                   | Protein         | 15g                    | Habitual                 | Neutral        | 6 mos     | Agency & Industry |

**Table S2.** Full Table of Characteristics (Continued).

| Study, year                             | Participants               | Mean Age (SD or range), y * | Mean BMI or Body Weight (SD) † | Setting       | Design | Plant Protein Source | Animal Protein Source ‡ | Food Form § | Amount of substitution | Background Diet ¶ | Energy Balance | Follow-up | Funding #         |
|-----------------------------------------|----------------------------|-----------------------------|--------------------------------|---------------|--------|----------------------|-------------------------|-------------|------------------------|-------------------|----------------|-----------|-------------------|
| Liu et al. 2014 <sup>(55)</sup>         | 270 PM (270W)              | 57.9 (5.1)                  | N/A                            | OP, China     | P      | Soy                  | Dairy                   | Whole       | 12.8g                  | Habitual          | Neutral        | 6 mos     | Agency            |
| Lovati et al. 1987 <sup>(56)</sup>      | 12 HC (5M,7W)              | 45 (12.5)                   | 61.4 (1.7) kg                  | OP, Italy     | C      | Soy                  | Dairy & meat            | Protein     | N/A                    | LF (54:26:20)     | Neutral        | 4 wks     | Agency & Industry |
| Ma et al. 2005 <sup>(57)</sup>          | 159 HC (70M,89W)           | 56.6 (8.4)                  | 28.9 (4.3) kg/m <sup>2</sup>   | OP, USA       | P      | Soy                  | Dairy                   | Protein     | 31.5g                  | Habitual          | Neutral        | 5 wks     | Industry          |
| Ma et al. 2011 <sup>(58)</sup>          | 90 HC (26M,64W)            | 51.7 (10.6)                 | 23.6 (3.3) kg/m <sup>2</sup>   | OP, China     | P      | Soy                  | Dairy                   | Protein     | 18g                    | Habitual          | Neutral        | 8 wks     | Industry          |
| Maki et al. 2010 <sup>(59)</sup>        | 58 HC (26M,32W)            | 50.8 (12)                   | 27.7 (4.8) kg/m <sup>2</sup>   | OP, USA       | P      | Soy                  | Dairy                   | Protein     | 25g                    | NCEP TLC          | Neutral        | 4 wks     | Industry          |
| Markova et al. 2015 <sup>(60)</sup> † ‡ | 37 DM2 (24M,13W)           | 64.3 (6.1)                  | 30.5 (3.6) kg/m <sup>2</sup>   | OP, Germany   | P      | Pulses               | Dairy & meat            | Whole       | >65-70%                | (40:30:30)        | Neutral        | 6 wks     | N/A               |
| Matthan et al. 2007 <sup>(61)</sup>     | 28 HC (2M,26W)             | 65 (6)                      | 27 (3) kg/m <sup>2</sup>       | OP, USA       | C      | Soy                  | Various                 | Whole       | 37.5g                  | NCEP TLC          | Neutral        | 6 wks     | Agency            |
| McVeigh et al. 2006 <sup>(62)</sup>     | 35 N (35M)                 | 27.9 (5.7)                  | 25.4 (3) kg/m <sup>2</sup>     | OP, Canada    | C      | Soy                  | Dairy                   | Protein     | 32g                    | Habitual          | Neutral        | 57 d      | Agency & Industry |
| Mercer et al. 1987 <sup>(63)</sup>      | 33 N (23M,10W)             | 46.7 (10.8)                 | N/A                            | OP, Canada    | C      | Soy                  | Dairy                   | Protein     | 19g                    | Habitual          | Neutral        | 6 wks     | Agency            |
| Meredith et al. 1989 <sup>(64)</sup>    | 10 N (10W)                 | 27.3 (6.3)                  | 22.5 (2.6) kg/m <sup>2</sup>   | OP, USA       | C      | Soy                  | Dairy                   | Whole       | 22g                    | Plant-based diet  | Neutral        | 3 wks     | Agency            |
| Meyer et al. 2004 <sup>(65)</sup>       | 23 HC and/or HTN (13M,10W) | 54 (8.6)                    | 26.2 (2.9) kg/m <sup>2</sup>   | OP, Australia | C      | Soy                  | Dairy                   | Whole       | >30g                   | Habitual          | Neutral        | 5 wks     | Agency & Industry |
| Miraghajani et al. 2013 <sup>(66)</sup> | 25 DM2,CKD (10M,15W)       | 51 (10)                     | 28 (4) kg/m <sup>2</sup>       | OP, Iran      | C      | Soy                  | Dairy                   | Whole       | 2.5g                   | Nephropathy diet  | Neutral        | 4 wks     | Agency            |
| Napora et al. 2011 <sup>(67)</sup>      | 33 ADT (33M)               | 69.1 (9.3)                  | 29.4 (5.3) kg/m <sup>2</sup>   | IP, USA       | P      | Soy                  | Dairy                   | Protein     | 20g                    | Habitual          | Neutral        | 12 wks    | N/A               |
| Onning et al. 1998 <sup>(68)</sup>      | 22 N (11M,11W)             | 31.5 (23-54)                | (20-25)) kg/m <sup>2</sup>     | OP, Sweden    | P      | Soy                  | Dairy                   | Whole       | 22.5g-30g              | Habitual          | Neutral        | 4 wks     | Agency            |
| Padhi et al. 2015 <sup>(69)</sup>       | 213 HC (78M,135W)          | 55 (8.8)                    | 28 (4.6) kg/m <sup>2</sup>     | OP, Canada    | P      | Soy                  | Dairy                   | Whole       | 12.5g, 25g             | Habitual          | Neutral        | 6 wks     | Agency & Industry |

**Table S2.** Full Table of Characteristics (Continued).

| Study, year                           | Participants        | Mean Age (SD or range), y * | Mean BMI or Body Weight (SD) † | Setting       | Design | Plant Protein Source | Animal Protein Source ‡ | Food Form § | Amount of substitution | Background Diet ¶ | Energy Balance | Follow-up | Funding #         |
|---------------------------------------|---------------------|-----------------------------|--------------------------------|---------------|--------|----------------------|-------------------------|-------------|------------------------|-------------------|----------------|-----------|-------------------|
| Pipe et al. 2009 <sup>(70)**</sup>    | 29 DM2,PM (16M,13W) | 60.1 (9.6)                  | 29.6 (4.1) kg/m <sup>2</sup>   | OP, Canada    | C      | Soy                  | Dairy                   | Protein     | 40g                    | Habitual          | Neutral        | 57 d      | Agency & Industry |
| Potter et al. 1993 <sup>(71)</sup>    | 25 HC (25M)         | 61 (48-78)                  | 30.2 (6.7) kg/m <sup>2</sup>   | IP, USA       | C      | Soy                  | Dairy                   | Protein     | 50g                    | (55:<30:15)       | Neutral        | 4 wks     | Industry          |
| Puska et al. 2002 <sup>(72)</sup>     | 52 HC (31M,21W)     | 55.8 (35-70)                | N/A                            | OP, Finland   | P      | Soy                  | Dairy                   | Protein     | 52g                    | Habitual          | Neutral        | 6 wks     | Industry          |
| Puska et al. 2004 <sup>(73)**</sup>   | 132 HC (77M,66W)    | Median 58 (30-70)           | 27 (9.1) kg/m <sup>2</sup>     | OP, Finland   | P      | Soy                  | Dairy                   | Protein     | 41.4g                  | Habitual          | Neutral        | 8 wks     | Agency & Industry |
| Roughhead et al. 2005 <sup>(74)</sup> | 13 PM (13W)         | 59.9 (5)                    | 26 kg/m <sup>2</sup>           | OP, USA       | C      | Soy                  | Meat                    | Protein     | 25g                    | (55:30:15)        | Neutral        | 7 wks     | Agency & Industry |
| Santo et al. 2008 <sup>(75)</sup>     | 30 N (30M)          | 24.2 (2.3)                  | 23.8 (3.7) kg/m <sup>2</sup>   | OP, USA       | P      | Soy                  | Dairy                   | Protein     | 25g                    | Habitual          | N/A            | 4 wks     | Industry          |
| Shidfar et al. 2009 <sup>(76)</sup>   | 42 HC,PM (42W)      | 55 (4.8)                    | 27 (3.1) kg/m <sup>2</sup>     | OP, Iran      | P      | Soy                  | Dairy                   | Whole       | 50g                    | Habitual          | Neutral        | 10 wks    | N/A               |
| Shige et al. 1998 <sup>(77)</sup>     | 11 N (11M)          | 32.6 (6.4)                  | 24.6 (2.8) kg/m <sup>2</sup>   | OP, Japan     | C      | Soy                  | Dairy                   | Protein     | 20g                    | Japanese diet     | Neutral        | 3 wks     | Industry          |
| Sirtori et al. 1977 <sup>(78)</sup>   | 20 HC (10M,10W)     | (22-68)                     | N/A                            | IP, Italy     | C      | Soy                  | Various                 | Protein     | 55%                    | LF, LC, HPUFA     | N/A            | 3 wks     | Agency & Industry |
| Sirtori et al. 1999 <sup>(79)</sup>   | 21 HC (8M,13W)      | 51.9 (13.5)                 | 24.4 (3.6) kg/m <sup>2</sup>   | OP, Italy     | C      | Soy                  | Dairy                   | Whole       | 35g                    | LC, HPUFA         | Neutral        | 4 wks     | Agency            |
| Sirtori et al. 2002 <sup>(80)</sup>   | 20 FHC (4M,16W)     | 59.5 (8.4)                  | 24.2 (3.5) kg/m <sup>2</sup>   | OP, Italy     | C      | Soy                  | Dairy                   | Whole       | 25g                    | LC, HPUFA         | Neutral        | 4 wks     | Agency & Industry |
| Steele et al. 1992 <sup>(81)</sup>    | 32 N (15M,17W)      | 42.2 (16.2)                 | N/A                            | OP, Australia | C      | Soy                  | Dairy                   | Whole       | >16.5g                 | Habitual          | Neutral        | 4 wks     | Agency            |
| Steinberg et al. 2003 <sup>(82)</sup> | 28 PM (28W)         | 54.9 (5.3)                  | 24.6 (3.2) kg/m <sup>2</sup>   | OP, USA       | C      | Soy                  | Dairy                   | Protein     | 25g                    | Habitual          | Neutral        | 6 wks     | Industry          |
| Sucher et al. 2017 <sup>(83)</sup>    | 37 DM2 (24M:13F)    | 64.3 (6.3)                  | 30.2 (3.9) kg/m <sup>2</sup>   | OP, Germany   | P      | Pea                  | Dairy & meat            | Whole       | 72%                    | (40:30:30)        | Neutral        | 6 wks     | Agency & Industry |
| Tabibi et al. 2010 <sup>(84)</sup>    | 36 CKD (18M,18W)    | 52 (15)                     | 26 (5) kg/m <sup>2</sup>       | OP, Iran      | P      | Soy                  | Meat                    | Whole       | 14g                    | Habitual          | Neutral        | 8 wks     | Agency            |
| Takahira et al. 2011 <sup>(85)</sup>  | 46 O (11M,35W)      | 55.5 (12.4)                 | 29.2 (4) kg/m <sup>2</sup>     | OP, Japan     | P      | Soy                  | Dairy                   | Protein     | 12g                    | Habitual          | Neutral        | 20 wks    | Agency            |



**Table S2.** Full Table of Characteristics (Continued).

| Study, year                                  | Participants         | Mean Age (SD or range), y * | Mean BMI or Body Weight (SD) †  | Setting         | Design | Plant Protein Source  | Animal Protein Source ‡ | Food Form § | Amount of substitution | Background Diet ¶     | Energy Balance | Follow-up | Funding #         |
|----------------------------------------------|----------------------|-----------------------------|---------------------------------|-----------------|--------|-----------------------|-------------------------|-------------|------------------------|-----------------------|----------------|-----------|-------------------|
| Teede et al. 2001 <sup>(86)</sup>            | 179 N,PM (96M,83W)   | 60.5 (9.6)                  | 25.5 (2.6) kg/m <sup>2</sup>    | OP, Australia   | P      | Soy                   | Dairy                   | Protein     | 40g                    | Habitual              | Neutral        | 3 mos     | Agency            |
| Teixeira et al. 2000 <sup>(87)</sup>         | 81 HC (81M)          | 45.4 (11.4)                 | 27.4 (3.7) kg/m <sup>2</sup>    | OP, USA         | P      | Soy                   | Dairy                   | Protein     | 20g, 30g, 40g, 50g     | NCEP Step 1           | Neutral        | 6 wks     | Agency & Industry |
| Teixeira et al. 2004 <sup>(88)</sup>         | 14 DM2,CKD (14M)     | (53-73)                     | 29.8 (3) kg/m <sup>2</sup>      | OP, USA         | C      | Soy                   | Dairy                   | Protein     | 0.5g/kg                | 1g protein/kg, LF, LC | Neutral        | 8 wks     | Agency & Industry |
| Thorp et al. 2008 <sup>(89)</sup>            | 91 HC (34M,57W)      | 52.7 (1)                    | 27.3 (4.5) kg/m <sup>2</sup>    | OP, Australia   | C      | Soy                   | Dairy                   | Protein     | 12g, 24g               | Habitual              | Neutral        | 6 wks     | Agency & Industry |
| Tonstad et al. 2002 <sup>(90)</sup>          | 130 HC,PM (108M,22W) | 52.5 (8.4)                  | 25.3 (2.1) kg/m <sup>2</sup>    | OP, Norway      | P      | Soy                   | Dairy                   | Protein     | 30g, 50g               | AHA Step 1            | Neutral        | 16 wks    | Industry          |
| Van Horn et al. 2001 <sup>(91)</sup> (Oats)  | 64 HC,PM (64W)       | 66.6 (10.3)                 | 26.9 (3.8) kg/m <sup>2</sup>    | OP, USA         | P      | Soy                   | Dairy                   | Protein     | 29g                    | NCEP Step 1           | Neutral        | 6 wks     | Industry          |
| Van Horn et al. 2001 <sup>(91)</sup> (Wheat) | 63 HC,PM (63W)       | 66.6 (10.3)                 | 26.9 (3.8) kg/m <sup>2</sup>    | OP, USA         | P      | Soy                   | Dairy                   | Protein     | 29g                    | NCEP Step 1           | Neutral        | 6 wks     | Industry          |
| van Nielen et al. 2014 <sup>(92)</sup>       | 15 O,PM (15W)        | 61 (5)                      | Waist circumference: 90 (10) cm | OP, Netherlands | C      | Soy                   | Dairy & meat            | Whole       | 30g                    | (49:21:30)            | Neutral        | 4 wks     | Industry          |
| van Raaij et al. 1981 <sup>(93)*</sup> *     | 69 N (46M,30W)       | (18-28)                     | N/A                             | OP, Netherlands | P      | Soy                   | Dairy                   | Protein     | 65%                    | Western diet          | Neutral        | 4 wks     | Agency & Industry |
| van Raaij et al. 1982 <sup>(94)*</sup> *     | 57 N (32M,29W)       | 46 (9)                      | N/A                             | OP, Netherlands | P      | Soy                   | Dairy                   | Protein     | 60%                    | Western diet          | Negative       | 4 wks     | Agency & Industry |
| Vega-Lopez et al. 2010 <sup>(95)</sup>       | 30 HC (9M,21W)       | 61.8 (6.5)                  | 26.7 (3.2) kg/m <sup>2</sup>    | OP, USA         | C      | Various (Low Lys:Arg) | Various (High Lys:Arg)  | Whole       | >75%                   | (50:30:20)            | Neutral        | 5 wks     | Agency            |
| Vigna et al. 2000 <sup>(96)</sup>            | 77 PM (77W)          | 53.4 (3.3)                  | 25.9 (3.5) kg/m <sup>2</sup>    | OP, Italy       | P      | Soy                   | Dairy                   | Protein     | 40g                    | Habitual              | Neutral        | 12 wks    | Industry          |
| Weisse et al. 2010 <sup>(97)</sup>           | 43 HC (20M,23W)      | 43.9 (11.8)                 | 25.9 (4.5) kg/m <sup>2</sup>    | OP, Germany     | P      | Lupin                 | Dairy                   | Protein     | 35g                    | Habitual              | Neutral        | 6 wks     | Agency            |
| West et al. 2005 <sup>(98)</sup>             | 32 HC,PM (14M,18W)   | 58 (5.2)                    | 26.3 (3.1) kg/m <sup>2</sup>    | OP, USA         | C      | Soy                   | Dairy                   | Protein     | 25g                    | NCEP Step 1, HF       | N/A            | 6 wks     | Industry          |

**Table S2.** Full Table of Characteristics (Continued).

| Study, year                            | Participants        | Mean Age (SD or range), y * | Mean BMI or Body Weight (SD) † | Setting    | Design | Plant Protein Source | Animal Protein Source ‡ | Food Form § | Amount of substitution | Background Diet ¶ | Energy Balance | Follow-up | Funding #         |
|----------------------------------------|---------------------|-----------------------------|--------------------------------|------------|--------|----------------------|-------------------------|-------------|------------------------|-------------------|----------------|-----------|-------------------|
| Wheeler et al. 2002 <sup>(99)</sup>    | 17 DM2,CKD (14M,3W) | 56 (12.4)                   | 33.1 (5.8) kg/m <sup>2</sup>   | OP, USA    | C      | Legumes              | Dairy & meat            | Whole       | 60%                    | (53:30:17)        | Neutral        | 6 wks     | Agency & Industry |
| Wiebe et al. 1984 <sup>(100)</sup>     | 8 N (8M)            | 21 (3.2)                    | N/A                            | OP, Canada | C      | Various              | Dairy                   | Whole       | 55%                    | Western diet      | Neutral        | 3 wks     | Agency            |
| Wofford et al. 2012 <sup>(101)**</sup> | 352 N (205M,147 W)  | 47.7 (10.4)                 | 29.3 (4.5) kg/m <sup>2</sup>   | OP, USA    | C      | Soy                  | Dairy                   | Protein     | 40g                    | Habitual          | Neutral        | 8 wks     | Agency & Industry |
| Wolfe et al. 1981 <sup>(102)</sup>     | 7 HC (7M)           | 41.9 (10.8)                 | 76 (13.2) kg                   | OP, Canada | C      | Soy                  | Dairy & meat            | Protein     | 47g                    | Habitual, LC      | Neutral        | 7 wks     | Agency & Industry |
| Wolfe et al. 1985 <sup>(103)</sup>     | 5 HC (2M,3W)        | 56 (8.9)                    | 84 (13.4) kg                   | OP, Canada | C      | Soy                  | Dairy & meat            | Protein     | 72g                    | Habitual, LC      | Neutral        | 5 wks     | Agency & Industry |
| Wong et al. 1998 <sup>(104)</sup> (N)  | 13 N (13M)          | 35.5 (7.2)                  | N/A                            | OP, USA    | C      | Soy                  | Dairy & meat            | Protein     | >75%                   | NCEP Step 1       | Neutral        | 5 wks     | Agency & Industry |
| Wong et al. 1998 <sup>(104)</sup> (HC) | 13 HC (13M)         | 41.4 (7.8)                  | N/A                            | OP, USA    | C      | Soy                  | Dairy & meat            | Protein     | >75%                   | NCEP Step 1       | Neutral        | 5 wks     | Agency & Industry |

ADT = androgen deprivation therapy, C = crossover, CKD = chronic kidney disease, DM2 = diabetes mellitus, FHC = familial hypercholesterolemia, HC = hypercholesterolemic, HF = high fibre, HPUFA = high polyunsaturated fat:saturated fat ratio, HTN = hypertension, IF = isoflavones, IP = inpatient, LC = low cholesterol, LF = low fat, LOV = lacto-ovo-vegetarian, N = normal, N/A = data not available, NP = not published, M = men, MS = metabolic syndrome, O = overweight/obese, OP = outpatient, P = parallel, PM = post-menopausal, Peri-M = peri-menopausal, W = women

\* Mean age and SD or range were used as available; where unavailable, post-menopausal (PM) was used for Azadbakht et al. 2007<sup>(8)</sup>, and median age and range were used for Puksa et al. 2004<sup>(73)</sup>.

† Baseline BMI values (kg/m<sup>2</sup>). Baseline body weight (kg) values are only reported when no data on body weight were available. Waist circumference (cm) was used for the study by van Nielen et al. 2014<sup>(92)</sup> as neither were available.

‡ Animal protein source. Multiple animal protein intervention arms within the same trial are separated by a comma.

§ Food form indicates whether test foods were in the form of whole foods (whole) and/or isolated protein supplements (protein).

|| Amount of protein substitution, per day unless otherwise indicated. Where data for grams of substitution was unavailable, grams/2000kcal, percentage protein replacement, grams per kilogram body weight, or serving sizes were used as available. Studies describing replacement of "most" protein are displayed as >75%. Multiple dosage levels within the same trial are separated by a comma.

¶ Background diet as described by study protocol. Where specific diets were not indicated, dietary breakdowns are listed as energy from (carbohydrate:fat:protein) where given, and where no information was given habitual diets were assumed. NCEP Step 1 diet has <30% fat, <1/3 saturated fat, and <300mg cholesterol. NCEP Step 2 diet has <30% fat, <1/4 saturated fat, and <200mg cholesterol. Nephropathy diet contains 0.8g protein/kg body weight. Hemodialysis diet contains 35%F, 1.2g protein/kg body weight, and 32-35kcal/kg body weight. Plant-based diet includes vegetarian, lacto-vegetarian, and lacto-ovo-vegetarian.

# Agency funding consists of funding from government, university, or not-for-profit health agency sources. The following studies had declared conflicts of interest: Gardner et al 2007<sup>(30)</sup>, Haub et al 2005<sup>(34)</sup>, Hermansen et al 2001<sup>(35)</sup>, Jenkins et al 2010<sup>(44)</sup>, Maki et al 2010<sup>(59)</sup>, Mercer et al 1987<sup>(63)</sup>, Padhi et al 2015<sup>(69)</sup>, Tonstad et al 2002<sup>(90)</sup>, and West et al 2005<sup>(98)</sup>. None of the other studies declared any conflicts of interest.

\*\* Includes baseline data before drop-outs where final data were not available for study characteristics

†† For Hill et al. 2015<sup>(36)</sup>, the background diet followed the DASH diet except for one arm of the animal protein arm which had increased protein content

‡‡ The data from Markova et al. 2015<sup>(60)</sup> are not yet published; BMI data from this study describe the first 30 patients enrolled

§§ Kestin et al. 1989<sup>(45)</sup> used an incomplete crossover design with three arms

**Table S3.** Bootstrap Analyses.

|                                                                                                                                                                                                                                            |
|--------------------------------------------------------------------------------------------------------------------------------------------------------------------------------------------------------------------------------------------|
| <b>LDL-C</b>                                                                                                                                                                                                                               |
| Total (95% CI): -0.16 [-0.20, -0.12]<br>Heterogeneity: $\text{Chi}^2 = 235.60$ , $\text{df} = 107$ ( $P < 0.0001$ ); $I^2 = 55\%$<br>Test for overall effect: $Z = -8.597$ ( $P < 0.0001$ )<br>Modified $H^2 = 1.218$<br>$\tau^2 = 0.0160$ |
| <b>non-HDL-C</b>                                                                                                                                                                                                                           |
| Total (95% CI): -0.18 [-0.22, -0.14]<br>Heterogeneity: $\text{Chi}^2 = 209.96$ , $\text{df} = 101$ ( $P < 0.0005$ ); $I^2 = 51\%$<br>Test for overall effect: $Z = -8.463$ ( $P < 0.0005$ )<br>Modified $H^2 = 1.035$<br>$\tau^2 = 0.0164$ |
| <b>ApoB</b>                                                                                                                                                                                                                                |
| Total (95% CI): -0.05 [-0.06, -0.03]<br>Heterogeneity: $\text{Chi}^2 = 51.36$ , $\text{df} = 36$ ( $P = 0.05$ ); $I^2 = 30\%$<br>Test for overall effect: $Z = -6.587$ ( $P < 0.0005$ )<br>Modified $H^2 = 0.449$<br>$\tau^2 = 0.0004$     |

Data are expressed in mmol/L for LDL-C and non-HDL-C, and g/L for ApoB. Paired analyses were applied to all crossover trials. Data are expressed as MDs with 95% CIs, using generic inverse-variance random-effects models. Inter-study heterogeneity was tested using the Cochran Q statistic (chi-square) at a significance level of  $P < 0.10$ .

**Table S4.** Post-Hoc Dose Response.

| <b>LDL</b>                                       |                                               |                                       |                                 |                |
|--------------------------------------------------|-----------------------------------------------|---------------------------------------|---------------------------------|----------------|
| <b>Dose threshold, grams AP replaced with PP</b> | <b>Dose ranges, grams AP replaced with PP</b> | <b><math>\beta</math> (95% CIs) *</b> | <b>Residual I<sup>2</sup> †</b> | <b>p-value</b> |
| 15                                               | $\leq 15$                                     | 0.003 (-0.020, 0.026)                 | 57.58%                          | 0.704          |
|                                                  | $> 15$                                        | -0.002 (-0.004, 0.001)                |                                 |                |
| 25                                               | $\leq 25$                                     | 0.001 (-0.008, 0.011)                 | 57.57%                          | 0.535          |
|                                                  | $> 25$                                        | -0.002 (-0.005, 0.001)                |                                 |                |
| 35                                               | $\leq 35$                                     | -0.001 (-0.007, 0.005)                | 57.59%                          | 0.846          |
|                                                  | $> 35$                                        | -0.002 (-0.006, 0.002)                |                                 |                |
| 45                                               | $\leq 45$                                     | -0.002 (-0.006, 0.002)                | 57.47%                          | 0.744          |
|                                                  | $> 45$                                        | -0.001 (-0.006, 0.005)                |                                 |                |
| 55                                               | $\leq 55$                                     | -0.002 (-0.005, 0.001)                | 57.03%                          | 0.512          |
|                                                  | $> 55$                                        | 0.001 (-0.007, 0.009)                 |                                 |                |
| <b>Non-HDL</b>                                   |                                               |                                       |                                 |                |
| <b>Dose threshold, grams AP replaced with PP</b> | <b>Dose ranges, grams AP replaced with PP</b> | <b><math>\beta</math> (95% CIs) *</b> | <b>Residual I<sup>2</sup> †</b> | <b>p-value</b> |
| 15                                               | $\leq 15$                                     | 0.006 (-0.018, 0.029)                 | 44.61%                          | 0.685          |
|                                                  | $> 15$                                        | 0.001 (-0.002, 0.003)                 |                                 |                |
| 25                                               | $\leq 25$                                     | 0.002 (-0.007, 0.010)                 | 42.15%                          | 0.839          |
|                                                  | $> 25$                                        | 0.001 (-0.002, 0.003)                 |                                 |                |
| 35                                               | $\leq 35$                                     | -0.001 (-0.007, 0.005)                | 44.29%                          | 0.462          |
|                                                  | $> 35$                                        | 0.002 (-0.002, 0.006)                 |                                 |                |
| 45                                               | $\leq 45$                                     | -0.002 (-0.006, 0.002)                | 45.25%                          | 0.112          |
|                                                  | $> 45$                                        | 0.005 (-0.001, 0.010)                 |                                 |                |
| 55                                               | $\leq 55$                                     | -0.001 (-0.004, 0.002)                | 45.16%                          | 0.076          |
|                                                  | $> 55$                                        | 0.007 (0, 0.015)                      |                                 |                |
| <b>Apo B</b>                                     |                                               |                                       |                                 |                |
| <b>Dose threshold, grams AP replaced with PP</b> | <b>Dose ranges, grams AP replaced with PP</b> | <b><math>\beta</math> (95% CIs) *</b> | <b>Residual I<sup>2</sup> †</b> | <b>p-value</b> |
| 15                                               | $\leq 15$                                     | 0.001 (-0.006, 0.008)                 | 37.42%                          | 0.836          |
|                                                  | $> 15$                                        | 0 (-0.001, 0.001)                     |                                 |                |
| 25                                               | $\leq 25$                                     | 0 (-0.003, 0.003)                     | 37.42%                          | 0.922          |
|                                                  | $> 25$                                        | 0 (-0.001, 0.001)                     |                                 |                |
| 35                                               | $\leq 35$                                     | 0 (-0.002, 0.002)                     | 37.42%                          | 0.899          |
|                                                  | $> 35$                                        | 0 (-0.001, 0.001)                     |                                 |                |
| 45                                               | $\leq 45$                                     | 0 (-0.002, 0.001)                     | 36.88%                          | 0.615          |
|                                                  | $> 45$                                        | 0.001 (-0.001, 0.002)                 |                                 |                |
| 55                                               | $\leq 55$                                     | 0 (-0.001, 0.001)                     | 36.11%                          | 0.519          |
|                                                  | $> 55$                                        | 0.001 (-0.002, 0.003)                 |                                 |                |

AP = animal protein; PP = plant protein

\*  $\beta$  is the slope derived from the piecewise linear meta-regression analyses and represents the treatment effect on LDL-C for doses above and below each dose-threshold representing grams animal protein replaced with plant protein

† The residual I<sup>2</sup> value indicates heterogeneity unexplained by each dose-threshold.

**Table S4.** GRADE Assessment.

| Quality assessment                                                          |                   |              |                      |              |                      |                                         | № of patients |                | Effect                                                 | Quality                               |
|-----------------------------------------------------------------------------|-------------------|--------------|----------------------|--------------|----------------------|-----------------------------------------|---------------|----------------|--------------------------------------------------------|---------------------------------------|
| № of studies                                                                | Study design      | Risk of bias | Inconsistency        | Indirectness | Imprecision          | Other considerations                    | Plant protein | Animal protein | Absolute (95% CI)                                      |                                       |
| Effects of vegetable protein compared to animal protein intake on LDL-C     |                   |              |                      |              |                      |                                         |               |                |                                                        |                                       |
| 108                                                                         | randomised trials | not serious  | serious <sup>1</sup> | not serious  | not serious          | potential publication bias <sup>2</sup> | 3637          | 3764           | MD <b>0.16 mmol/L lower</b> (0.2 lower to 0.12 lower)  | ⊕⊕⊕⊖<br>MODERATE due to inconsistency |
| Effects of vegetable protein compared to animal protein intake on non-HDL-C |                   |              |                      |              |                      |                                         |               |                |                                                        |                                       |
| 102                                                                         | randomised trials | not serious  | serious <sup>1</sup> | not serious  | not serious          | none                                    | 3502          | 3643           | MD <b>0.18 mmol/L lower</b> (0.22 lower to 0.14 lower) | ⊕⊕⊕⊖<br>MODERATE due to inconsistency |
| Effects of vegetable protein compared to animal protein intake on apo B     |                   |              |                      |              |                      |                                         |               |                |                                                        |                                       |
| 37                                                                          | randomised trials | not serious  | not serious          | not serious  | serious <sup>3</sup> | none                                    | 937           | 1083           | MD <b>0.05 g/L lower</b> (0.06 lower to 0.03 lower)    | ⊕⊕⊕⊖<br>MODERATE due to imprecision   |

CI: Confidence interval; MD: Mean difference

1. Significant ( $P < 0.05$ ) and substantial ( $I^2 > 50\%$ ) heterogeneity
2. Egger's test for publication bias was significant ( $P < 0.05$ ). However, significance is dependent upon one study with missing variance data, and additional Duval and Tweedie trim-and-fill analyses did not substantially alter the effect size or significance. Therefore there was no further downgrading.
3. 95% CI for risk estimates overlap a minimally important difference of 0.04g/L for apolipoprotein B

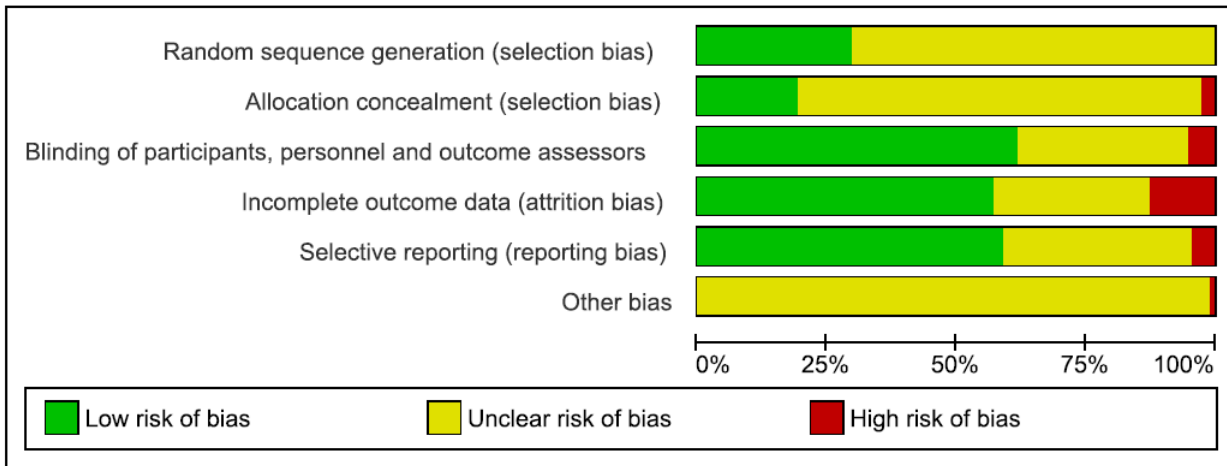

**Figure S1.** Cochrane Risk of Bias. Risk of bias assessment using Cochrane Risk of Bias Tool.

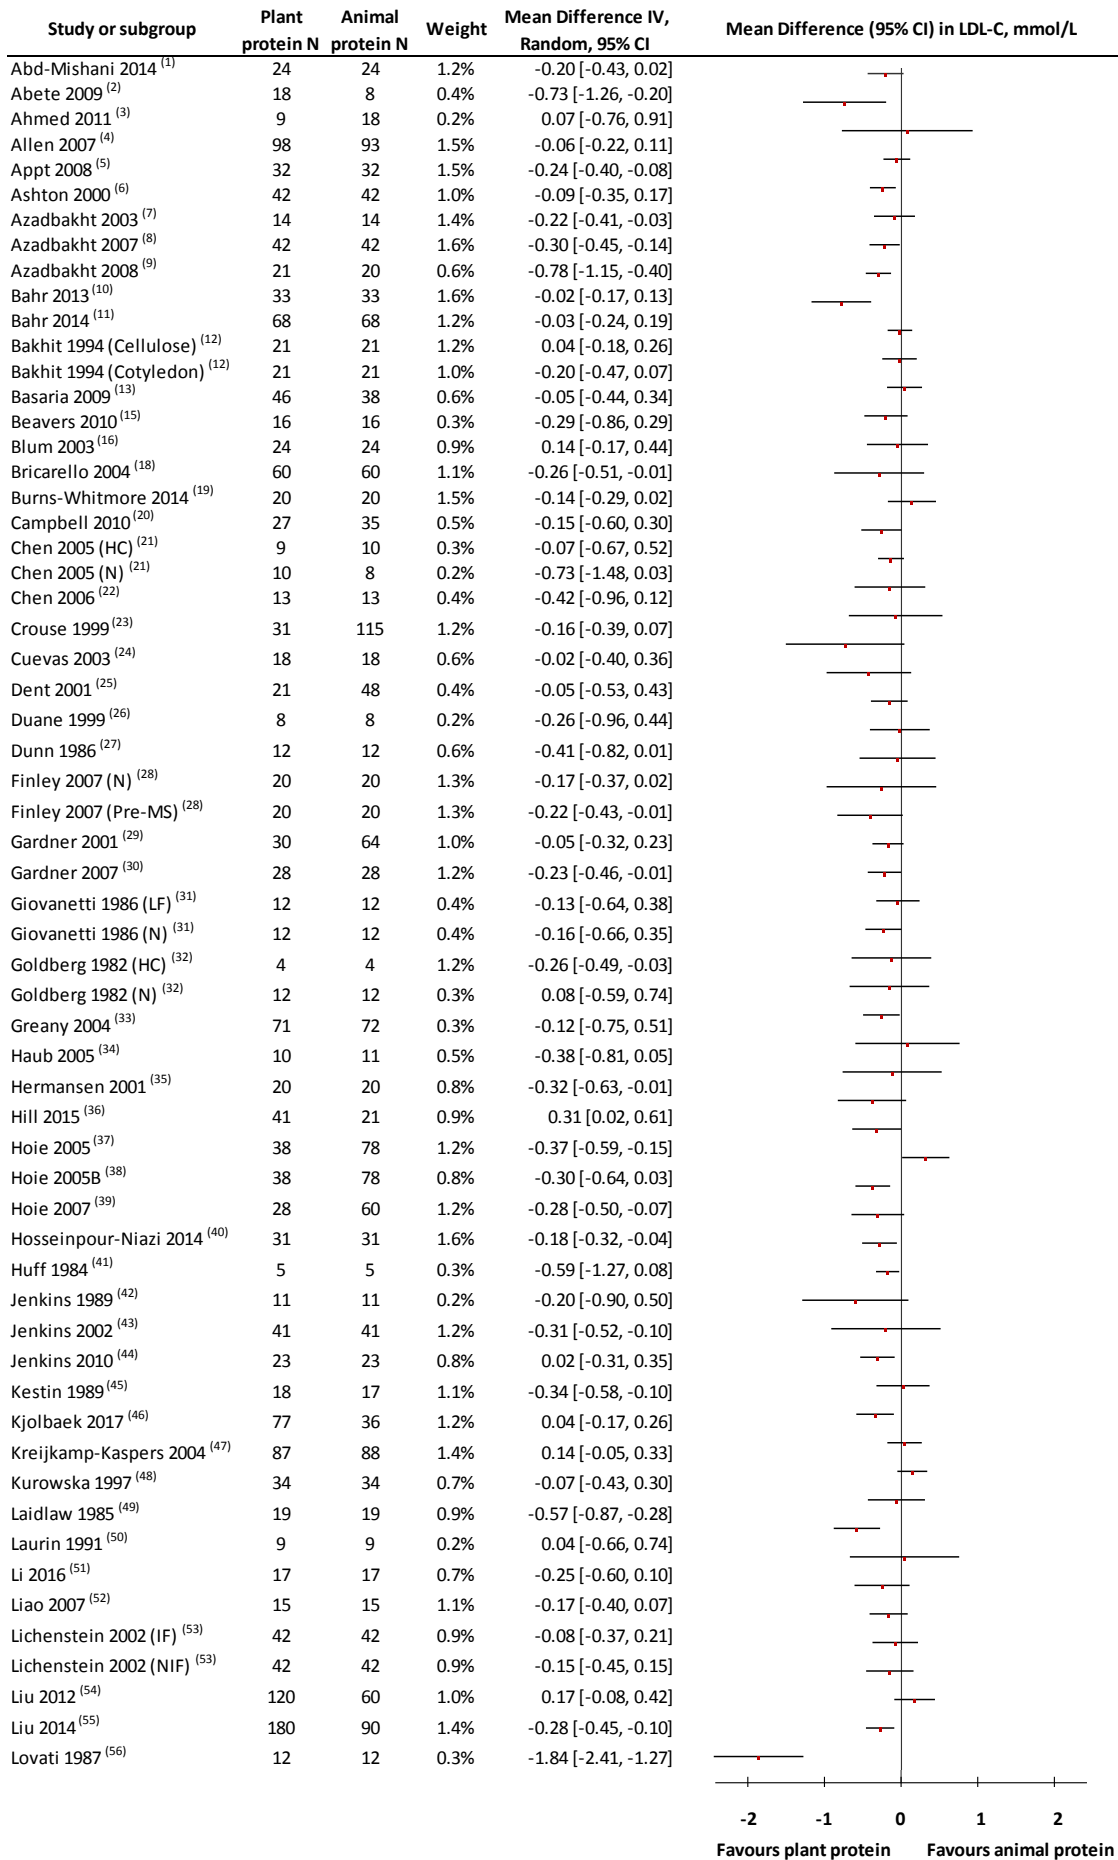

**Figure S2.** LDL-C Forest Plot, random-effects model.

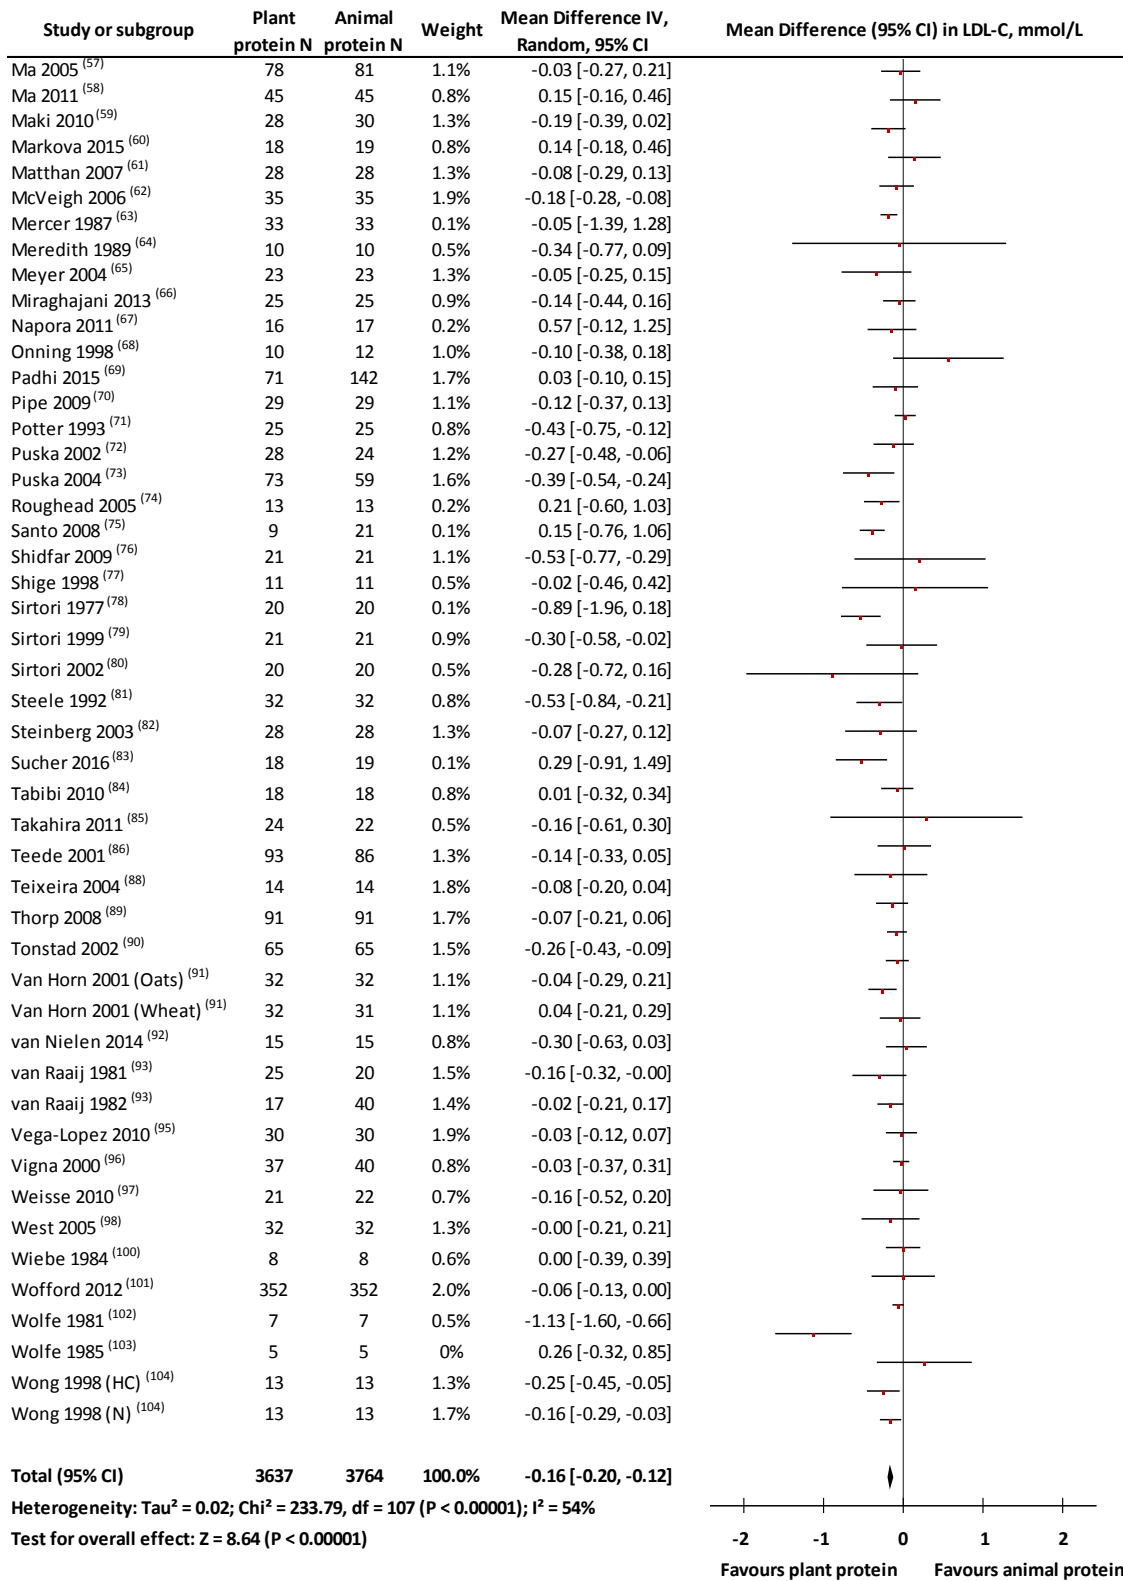

**Figure S2 (Continued).** LDL-C Forest Plot, random-effects model. HC=hypercholesterolemic; IF=isoflavones; LF=low-fat; N=normal; NIF=no isoflavones; Pre-MS=pre-metabolic syndrome. The pooled effect estimate (diamond) is shown. Paired analyses were applied to all crossover trials. The studies by Duane et al. 1999<sup>(26)</sup>, Lovati et al. 1987<sup>(56)</sup>, Sirtori et al. 2002<sup>(80)</sup>, and Van Horn et al. 2001<sup>(91)</sup> were missing variance data, which were imputed using the average standard of the mean differences across included trials based on the respective trial's sample size. Data are expressed as MDs with 95% CIs, using generic inverse-variance random-effects models. Inter-study heterogeneity was tested using the Cochran Q statistic (chi-square) at a significance level of P<0.10 and quantified by I<sup>2</sup>, levels of ≥50% represented substantial heterogeneity.



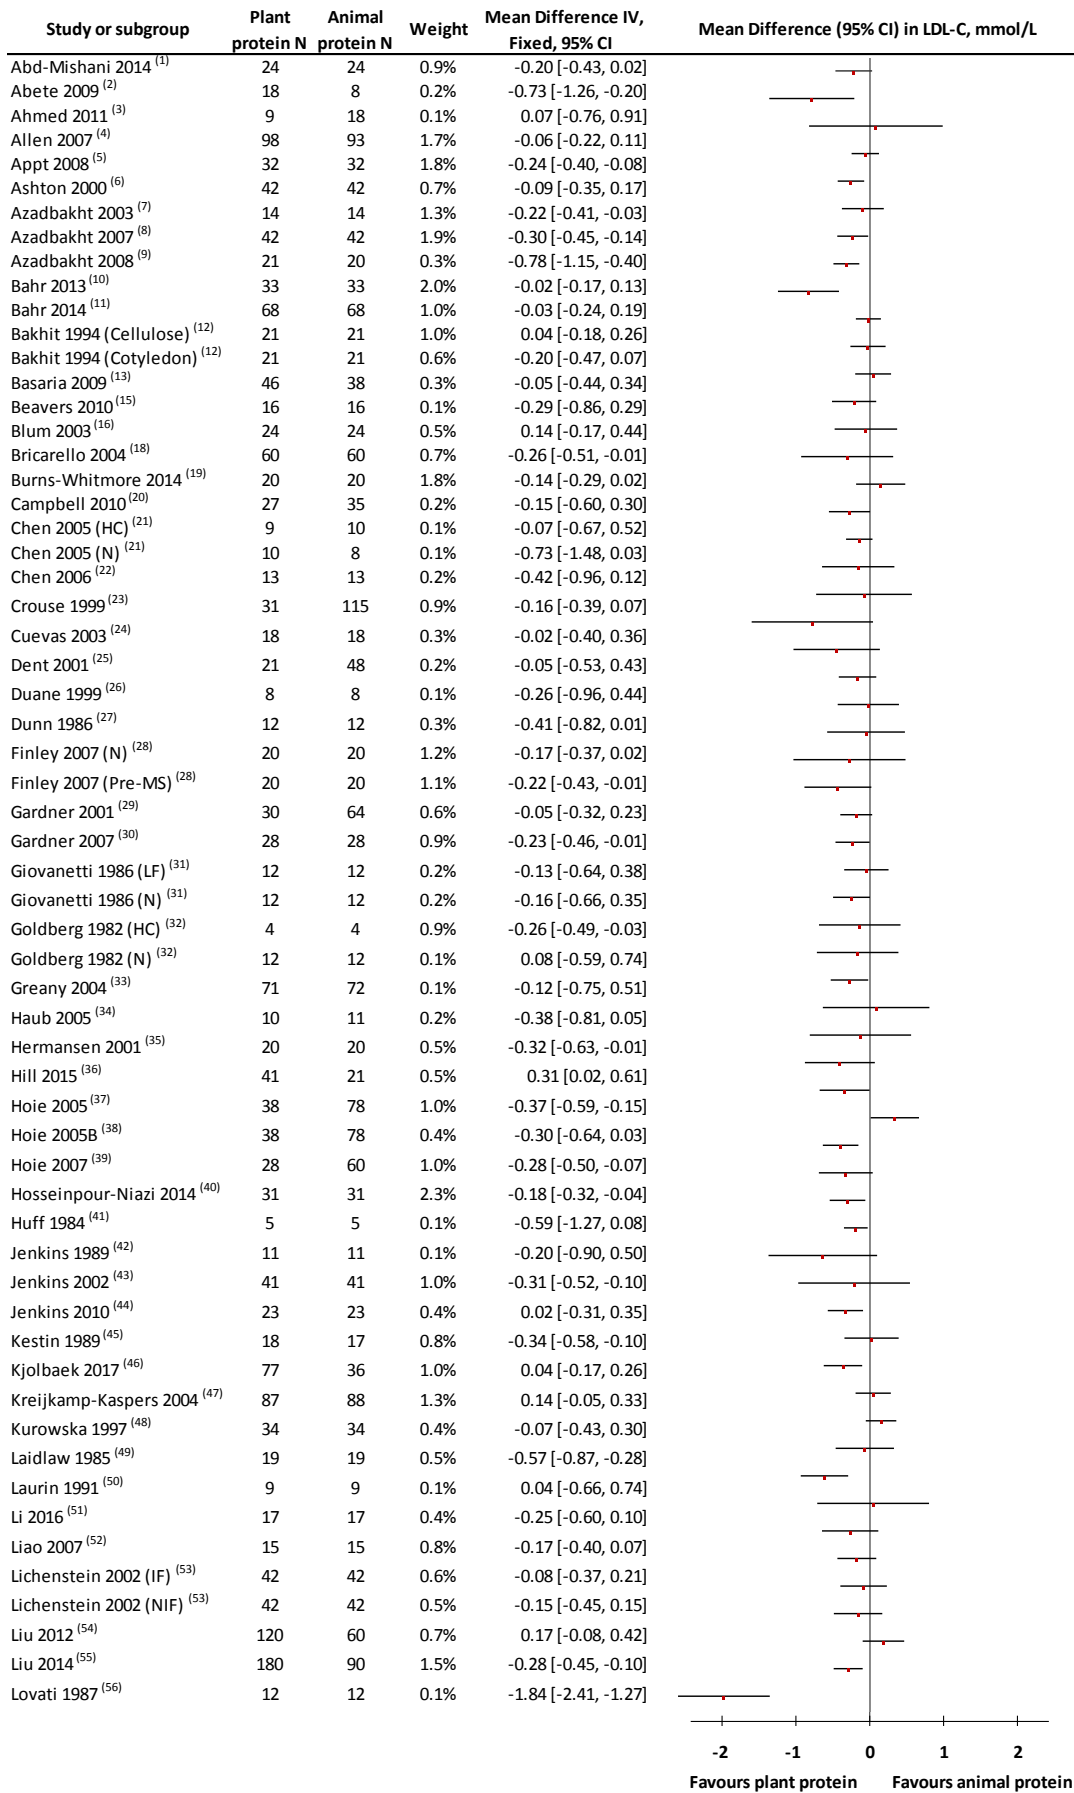

Figure S3. LDL-C Forest Plot, fixed-effects model.

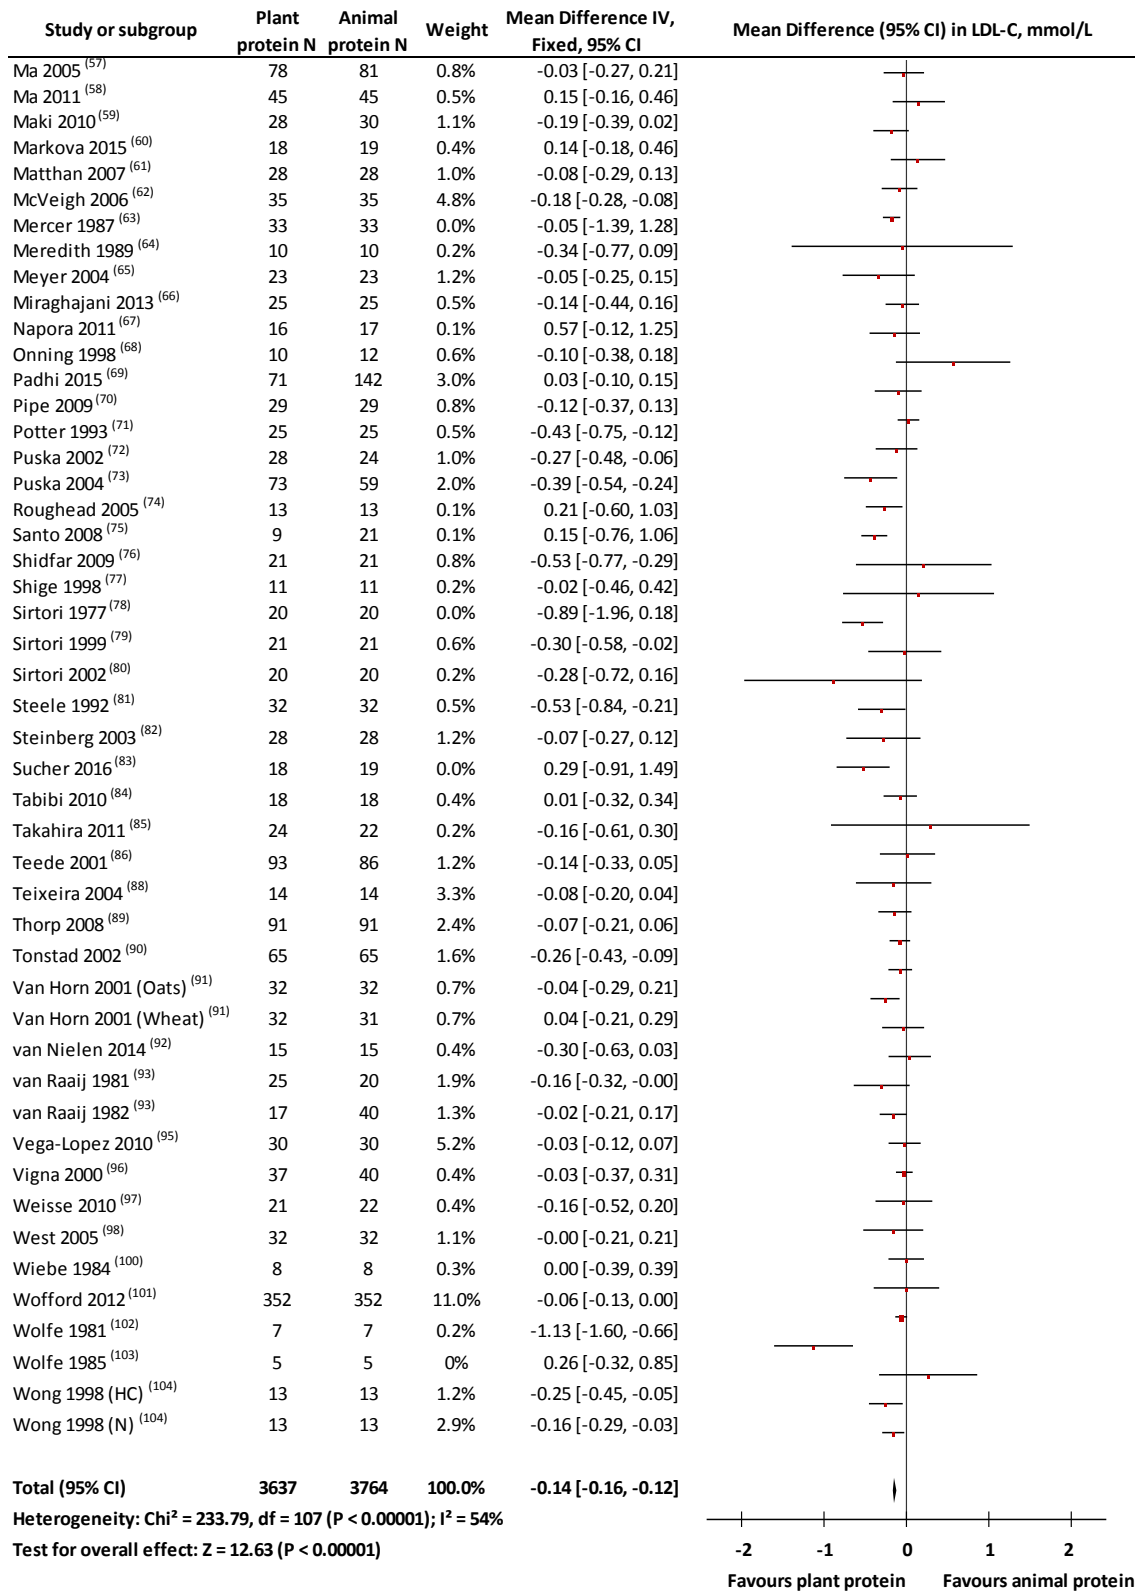

**Figure S3 (Continued).** LDL-C Forest Plot, fixed-effects model. HC=hypercholesterolemic; IF=isoflavones; LF=low-fat; N=normal; NIF=no isoflavones; Pre-MS=pre-metabolic syndrome. The pooled effect estimate (diamond) is shown. Paired analyses were applied to all crossover trials. The studies by Duane et al. 1999<sup>(26)</sup>, Lovati et al. 1987<sup>(56)</sup>, Sirtori et al. 2002<sup>(80)</sup>, and Van Horn et al. 2001<sup>(91)</sup> were missing variance data, which were imputed using the average standard of the mean differences across included trials based on the respective trial's sample size. Data are expressed as MDs with 95% CIs, using generic inverse-variance fixed-effects models. Inter-study heterogeneity was tested using the Cochran Q statistic (chi-square) at a significance level of P<0.10 and quantified by I<sup>2</sup>, levels of ≥50% represented substantial heterogeneity.

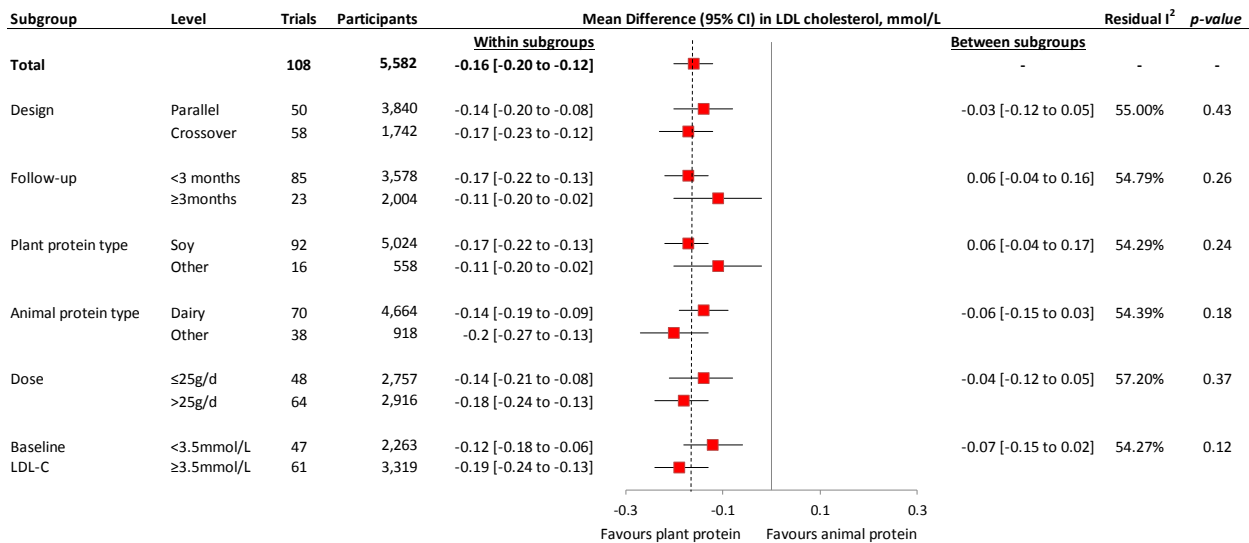

**Figure S4.** LDL-C Visual Subgroup. Point estimates for each subgroup level (squares) are the pooled effect estimates. The dashed line represents the pooled effect estimate for the overall (total) analysis. The residual  $I^2$  value indicates the interstudy heterogeneity unexplained by the subgroup. Statistically significant pairwise subgroup effect modification by meta-regression analyses at  $P < 0.05$ .

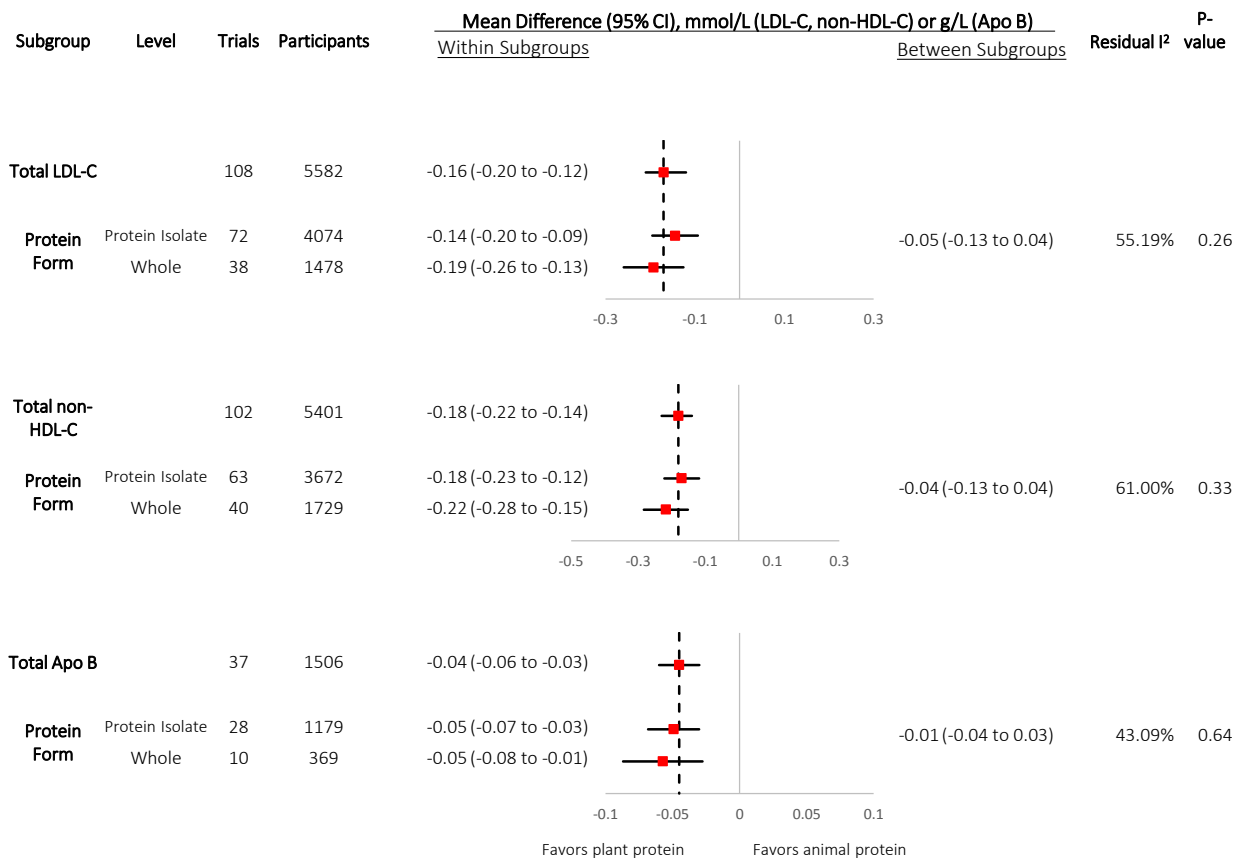

**Figure S5.** Post-Hoc Subgroups. Point estimates for each subgroup level (squares) are the pooled effect estimates. The dashed line represents the pooled effect estimate for the overall (total) analysis. The residual  $I^2$  value indicates the interstudy heterogeneity unexplained by the subgroup. Statistically significant pairwise subgroup effect modification by meta-regression analyses at  $P < 0.05$ .

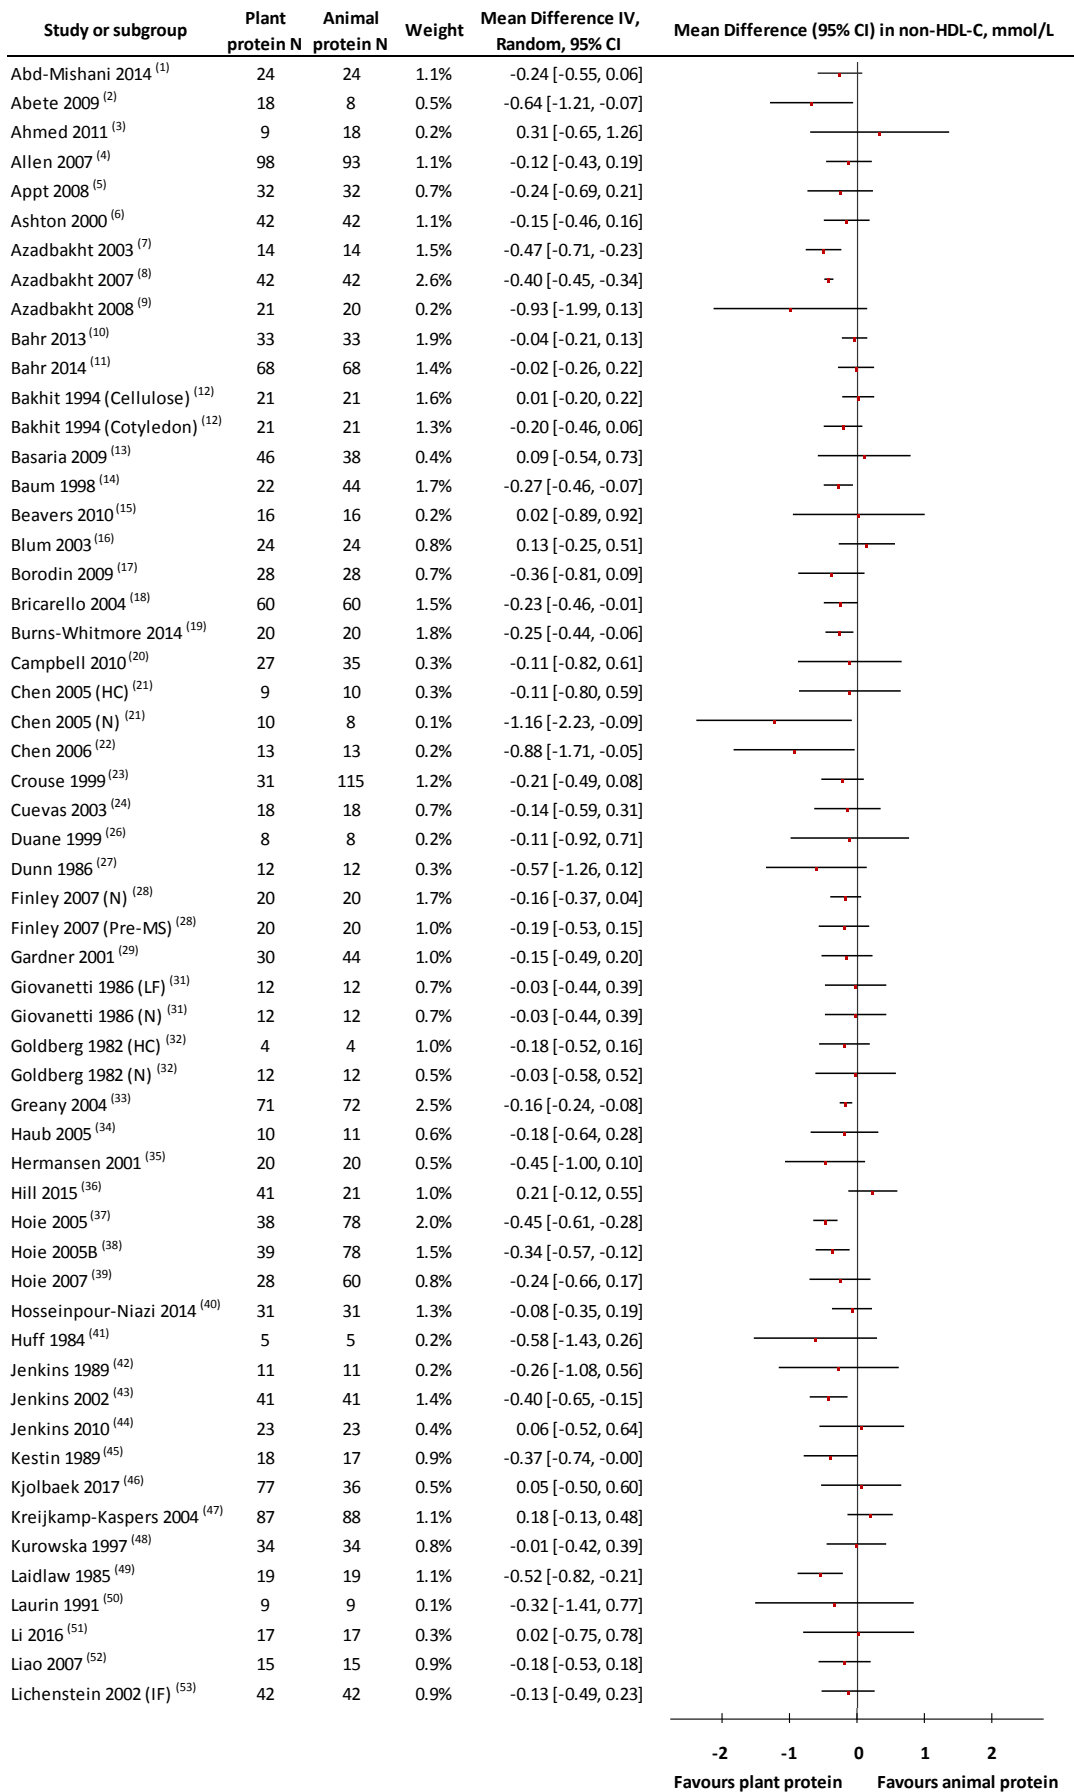

**Figure S6.** Non-HDL-C Forest Plot, random-effects model.

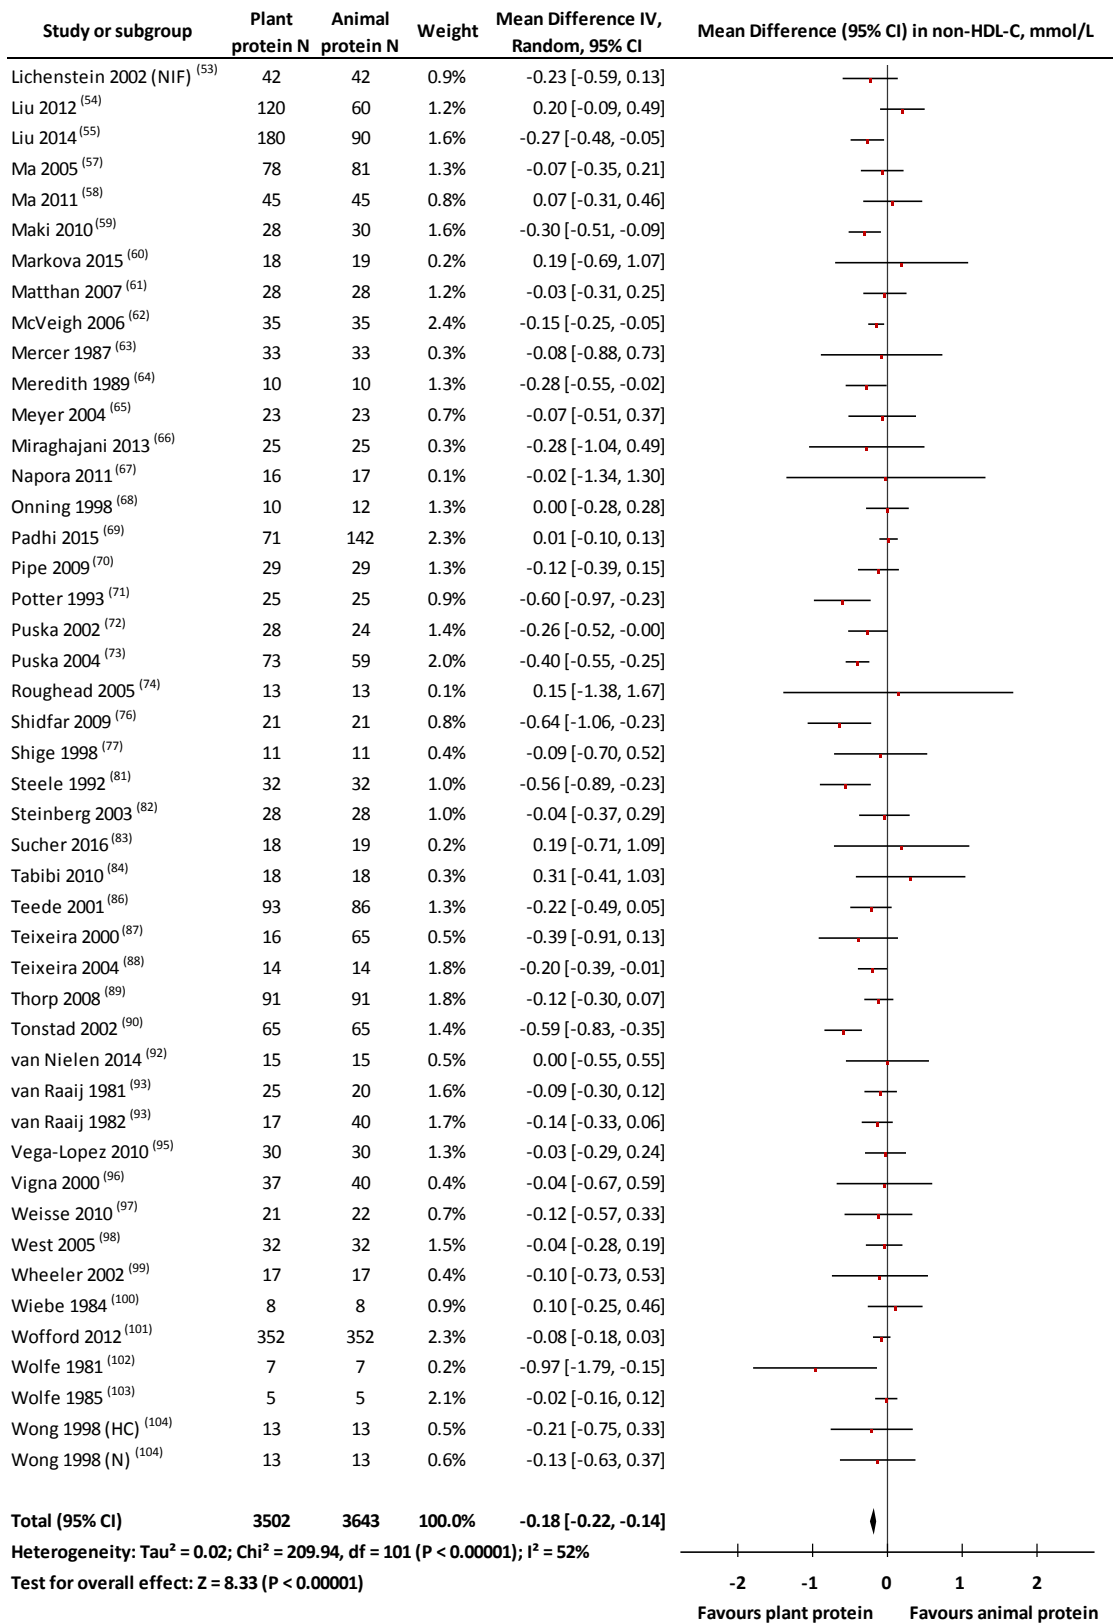

**Figure S6 (Continued).** Non-HDL-C Forest Plot, random-effects model. HC=hypercholesterolemic; IF=isoflavones; LF=low-fat; N=normal; NIF=no isoflavones; Pre-MS=pre-metabolic syndrome. The pooled effect estimate (diamond) is shown. Paired analyses were applied to all crossover trials. The study by Duane et al. 1999<sup>(26)</sup> was missing variance data, which was imputed using the average standard of the mean differences across included trials based on the respective trial's sample size. Data are expressed as MDs with 95% CIs, using generic inverse-variance random-effects models. Inter-study heterogeneity was tested using the Cochran Q statistic (chi-square) at a significance level of P<0.10 and quantified by I<sup>2</sup>, levels of ≥50% represented substantial heterogeneity.

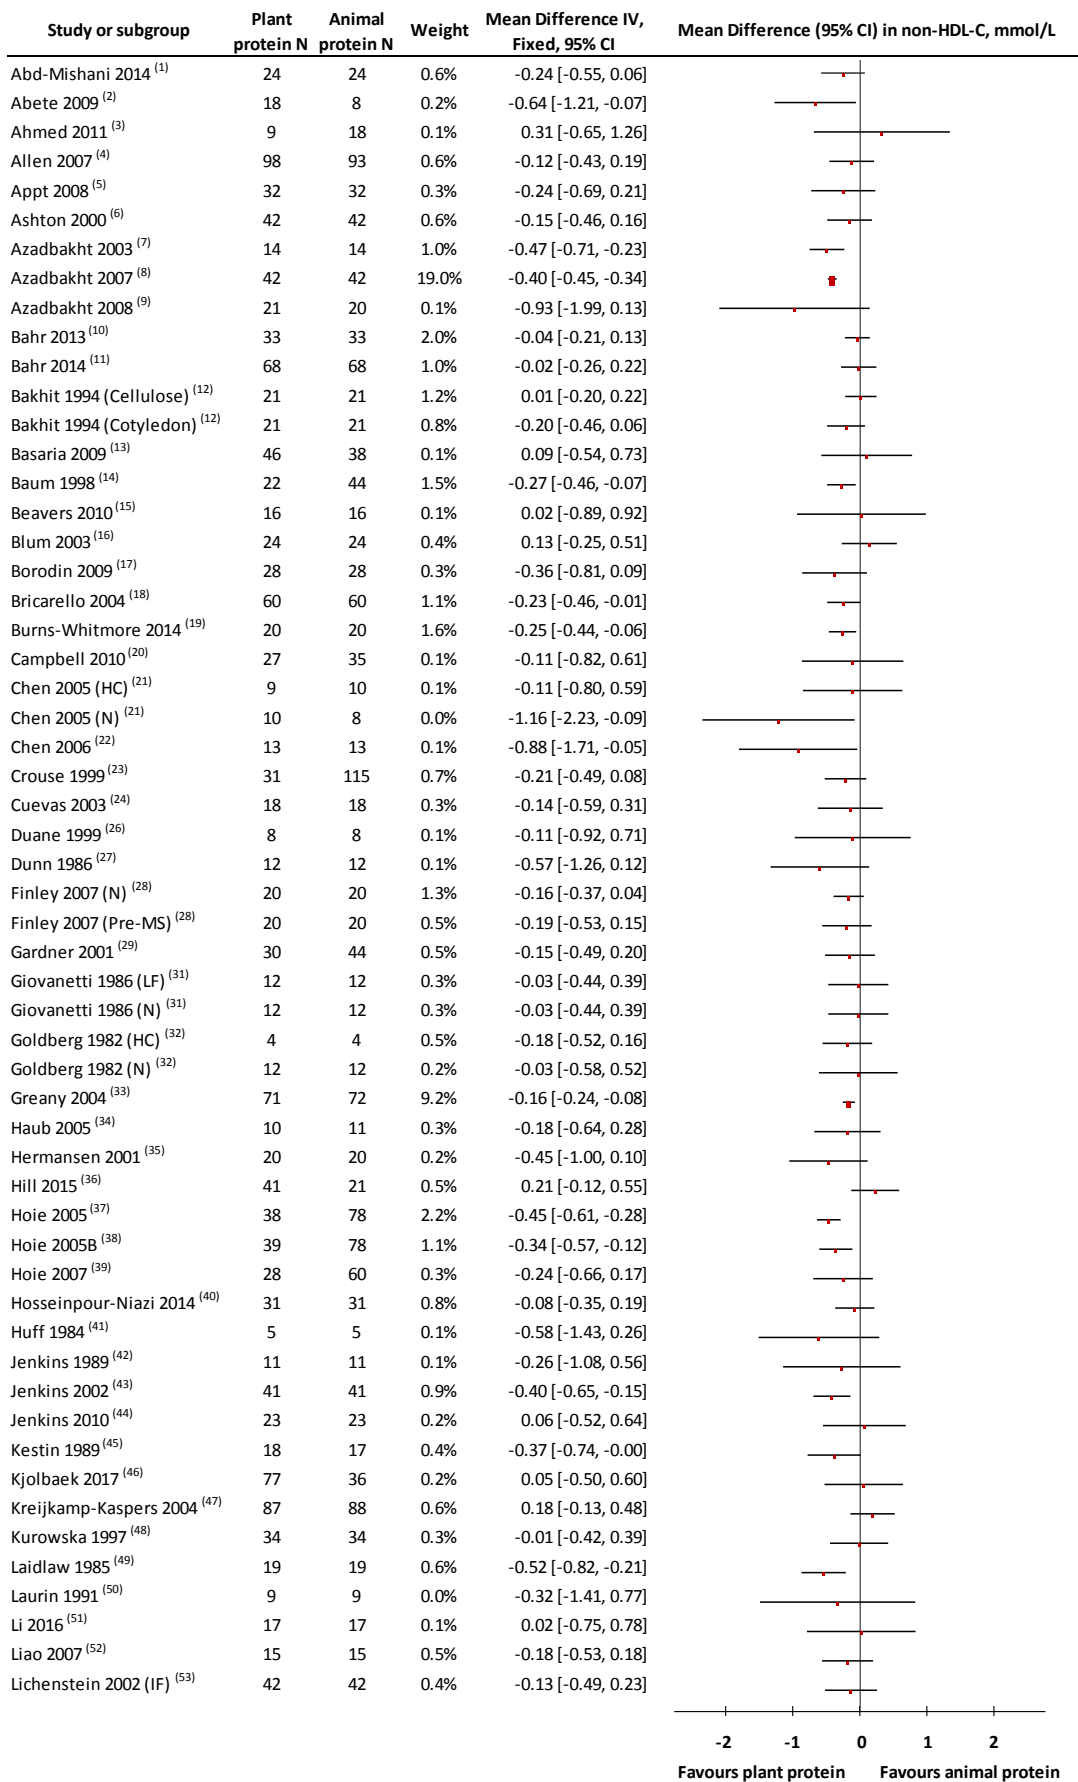

**Figure S7.** Non-HDL-C Forest Plot, fixed-effects model.

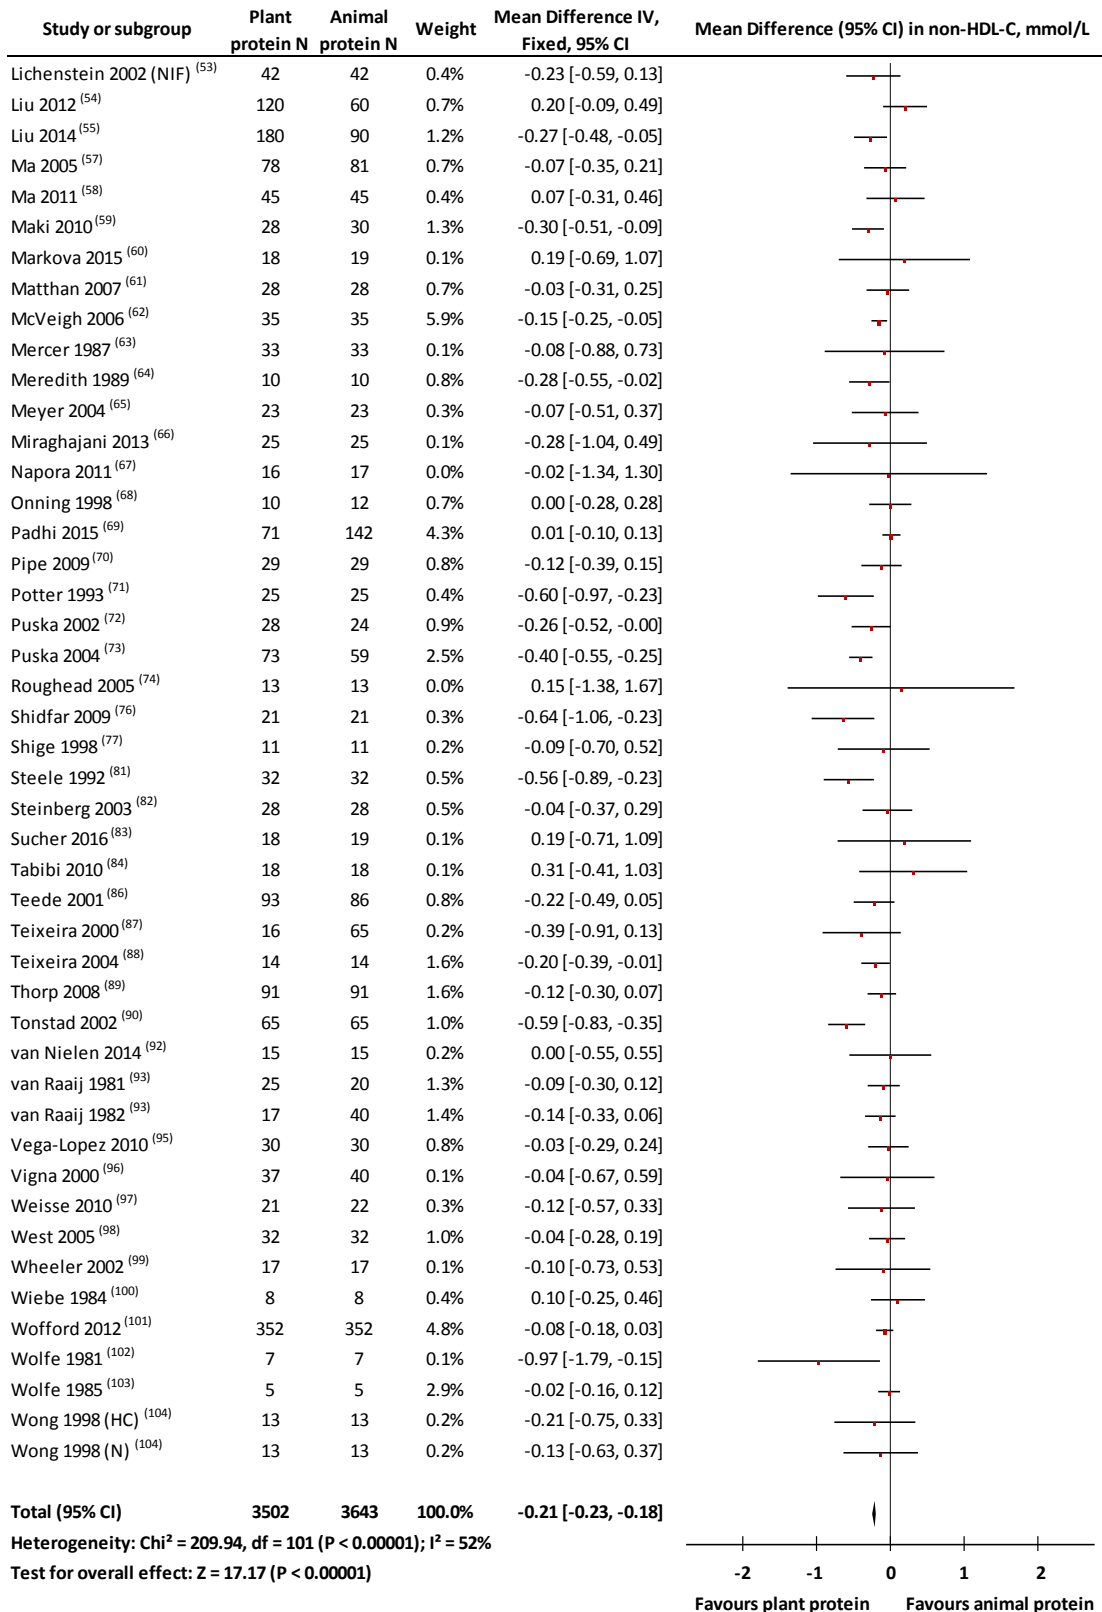

**Figure S7 (Continued).** Non-HDL-C Forest Plot, fixed-effects model. HC=hypercholesterolemic; IF=isoflavones; LF=low-fat; N=normal; NIF=no isoflavones; Pre-MS=pre-metabolic syndrome. The pooled effect estimate (diamond) is shown. Paired analyses were applied to all crossover trials. The study by Duane et al. 1999 <sup>(26)</sup> was missing variance data, which was imputed using the average standard of the mean differences across included trials based on the respective trial's sample size. Data are expressed as MDs with 95% CIs, using generic inverse-variance fixed-effects models. Inter-study heterogeneity was tested using the Cochran Q statistic (chi-square) at a significance level of P<0.10 and quantified by I<sup>2</sup>, levels of ≥50% represented substantial heterogeneity.



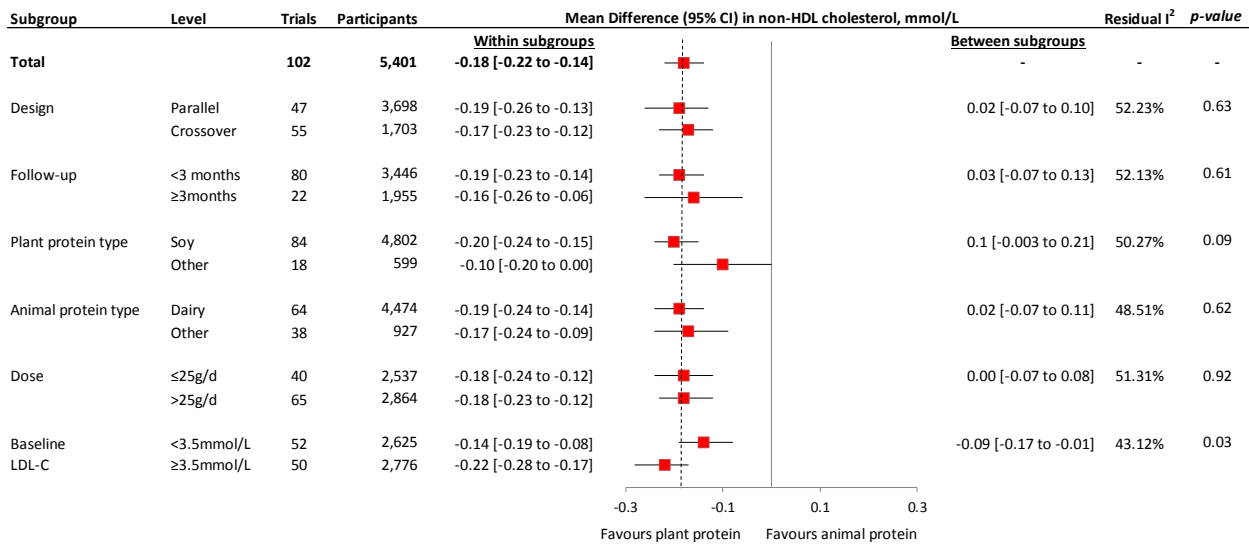

**Figure S8.** Non-HDL-C Visual Subgroup. Point estimates for each subgroup level (squares) are the pooled effect estimates. The dashed line represents the pooled effect estimate for the overall (total) analysis. The residual  $I^2$  value indicates the interstudy heterogeneity unexplained by the subgroup. Statistically significant pairwise subgroup effect modification by meta-regression analyses at  $P < 0.05$ .

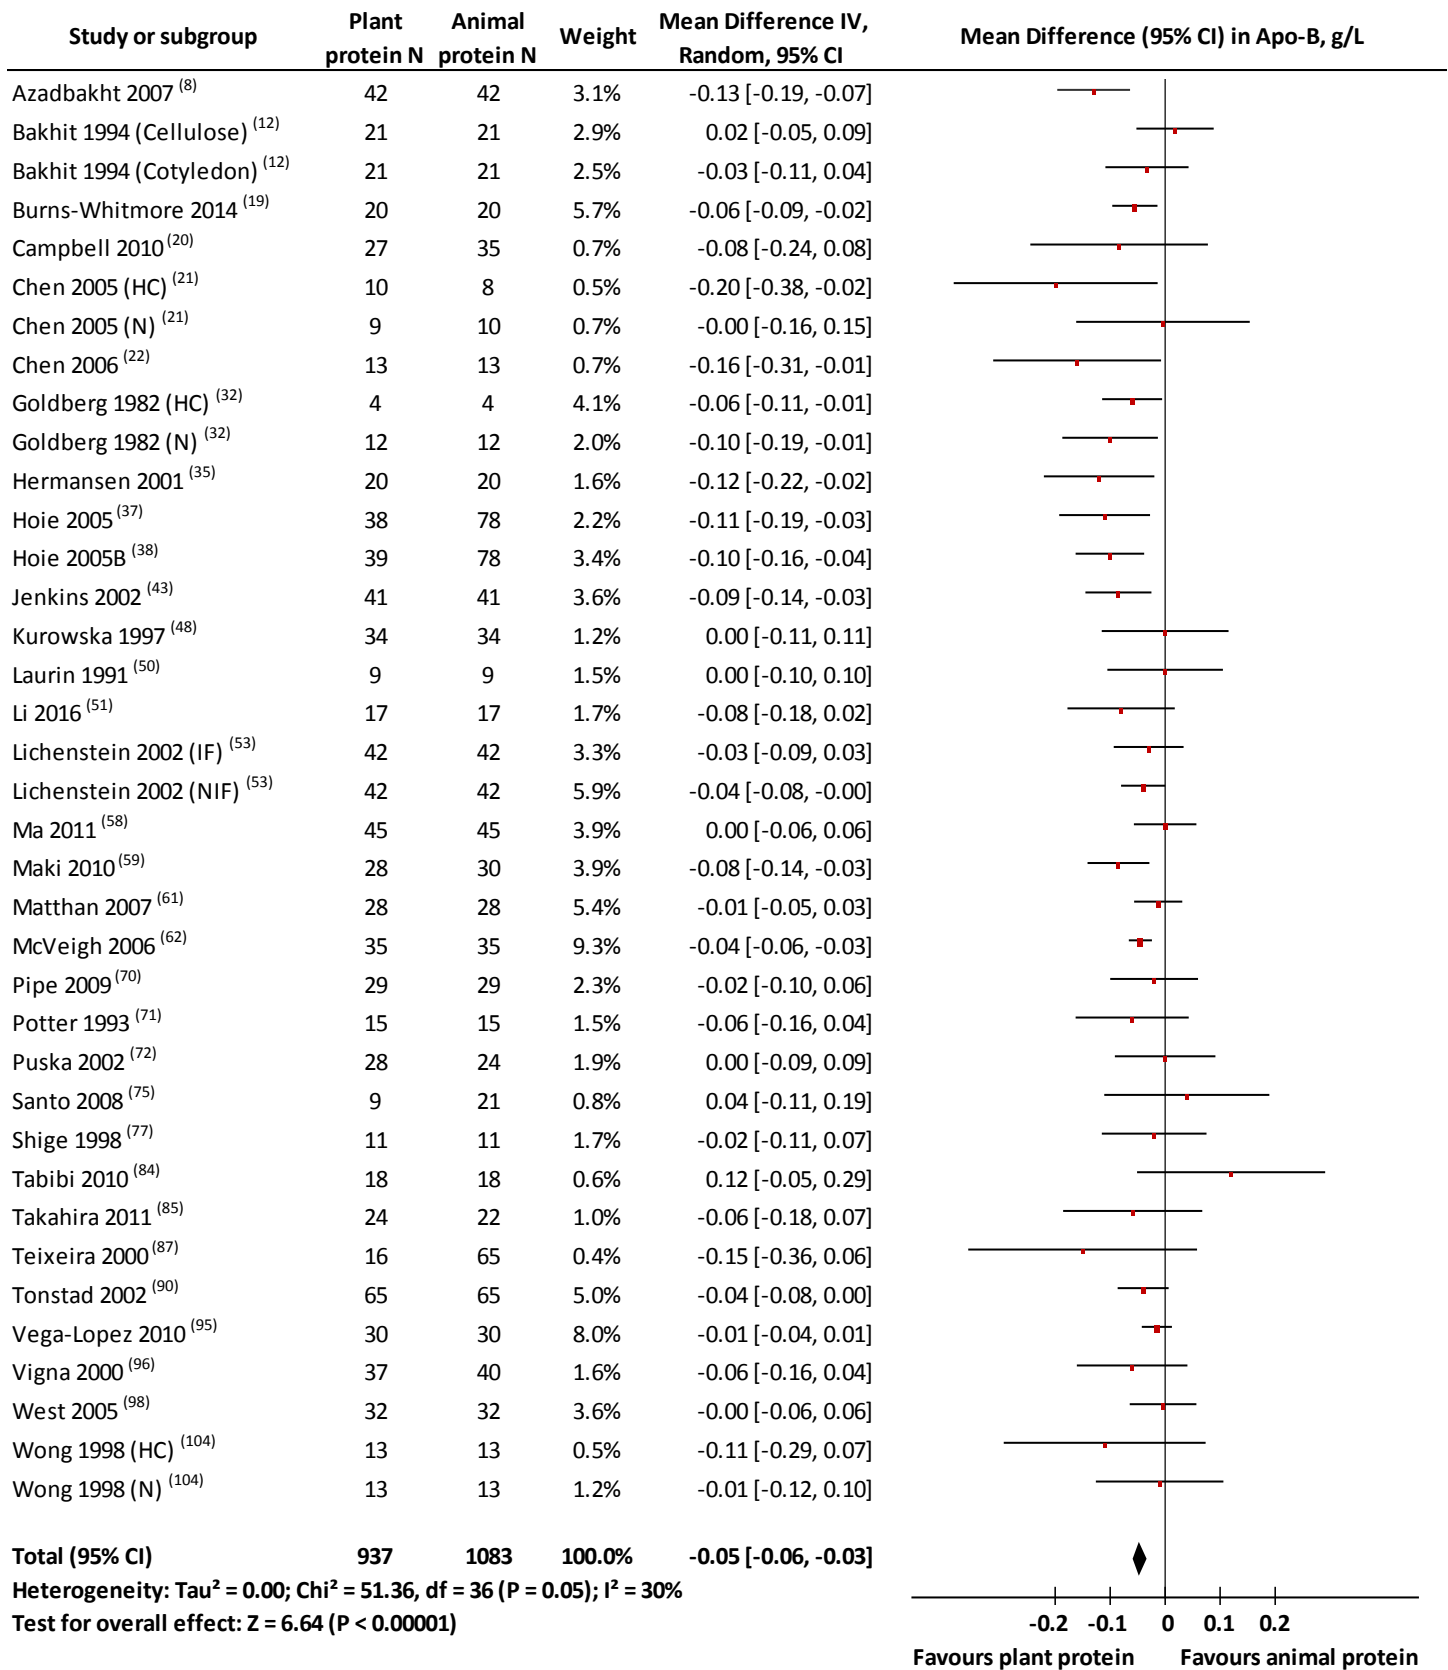

**Figure S9.** Apo-B Forest Plot, random-effects model. HC=hypercholesterolemic; IF=isoflavones; LF=low-fat; N=normal; NIF=no isoflavones. The pooled effect estimate (diamond) is shown. Paired analyses were applied to all crossover trials. Data are expressed as MDs with 95% CIs, using generic inverse-variance random-effects models. Inter-study heterogeneity was tested using the Cochran Q statistic (chi-square) at a significance level of  $P < 0.10$  and quantified by  $I^2$ , levels of  $\geq 50\%$  represented substantial heterogeneity.

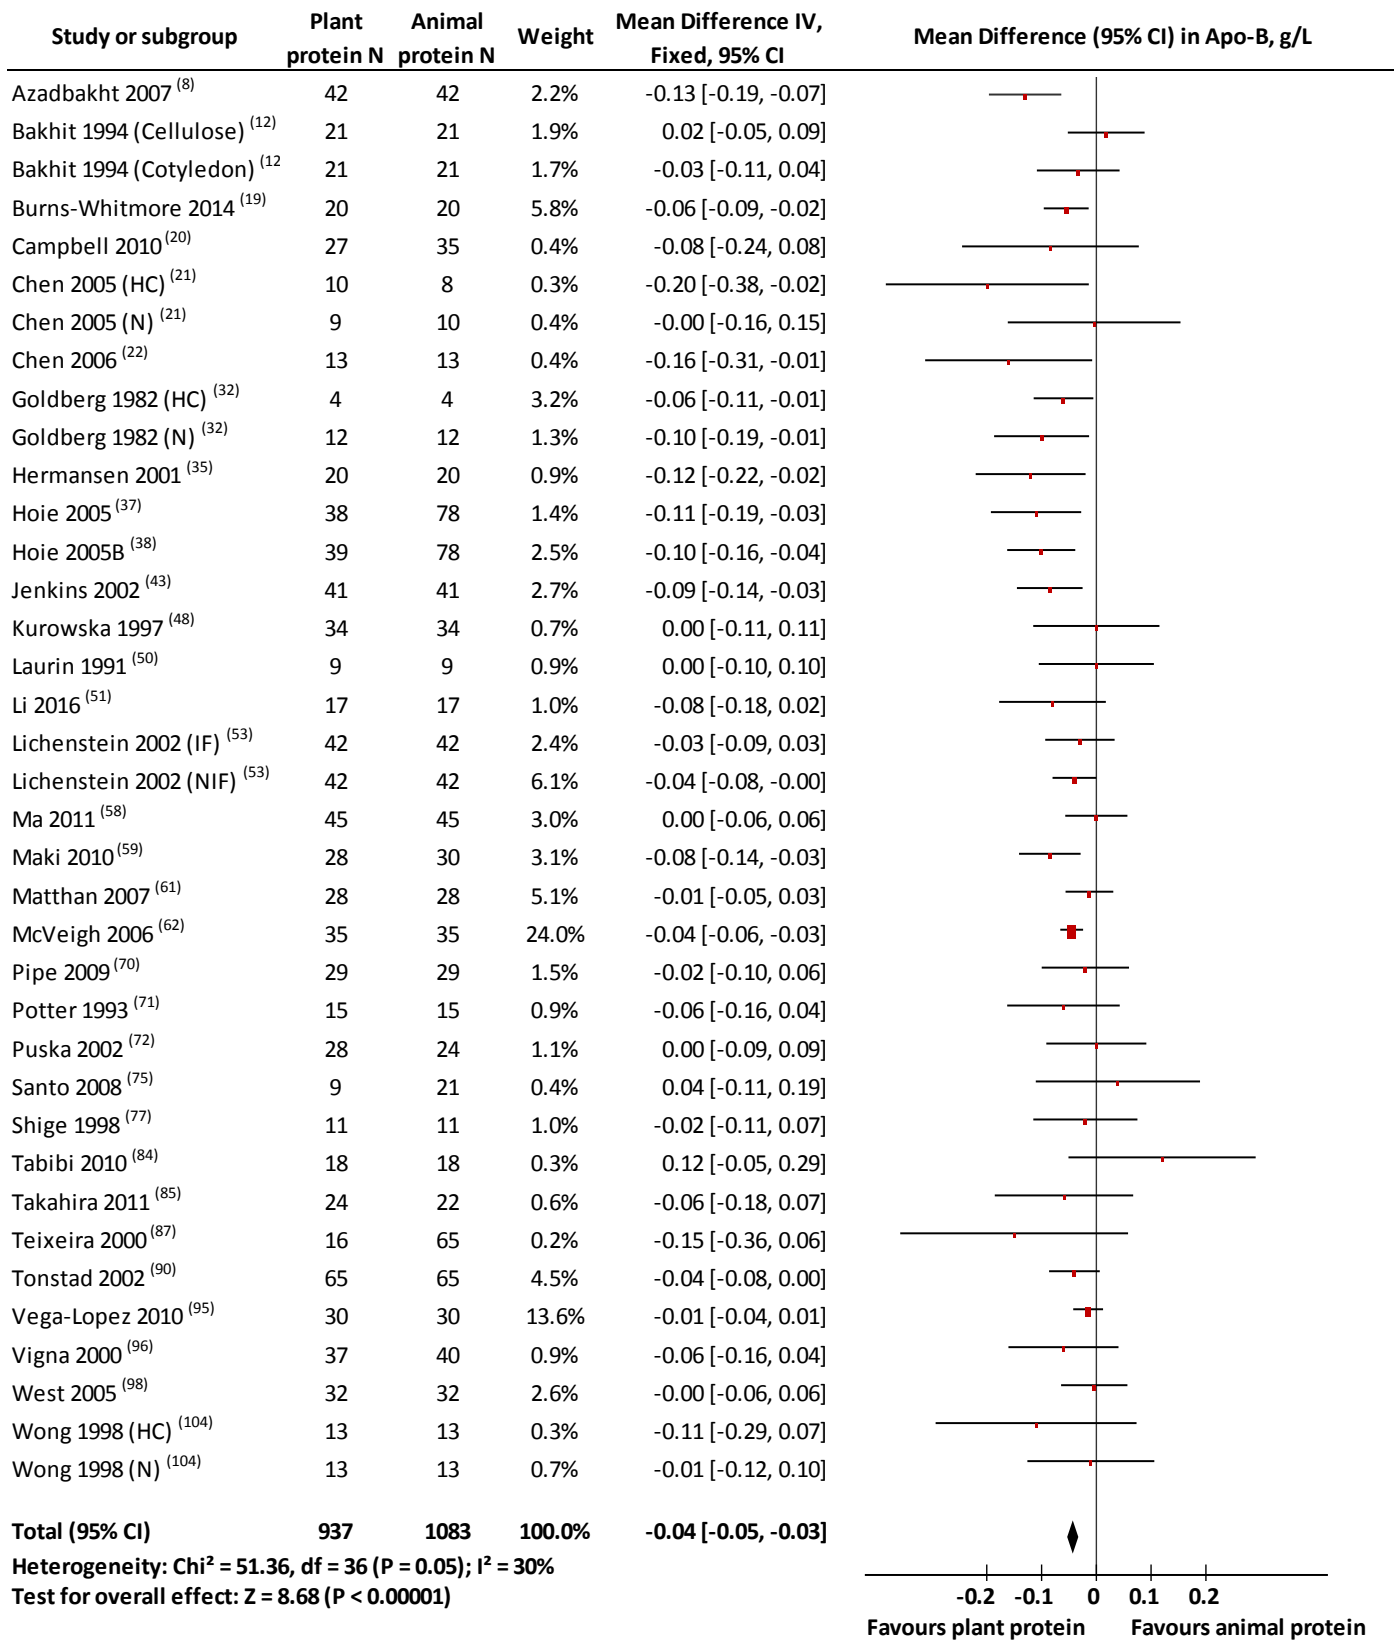

**Figure S10.** Apo-B Forest Plot, fixed-effects model. HC=hypercholesterolemic; IF=isoflavones; LF=low-fat; N=normal; NIF=no isoflavones. The pooled effect estimate (diamond) is shown. Paired analyses were applied to all crossover trials. Data are expressed as MDs with 95% CIs, using generic inverse-variance fixed-effects models. Inter-study heterogeneity was tested using the Cochran Q statistic (chi-square) at a significance level of  $P < 0.10$  and quantified by  $I^2$ , levels of  $\geq 50\%$  represented substantial heterogeneity.

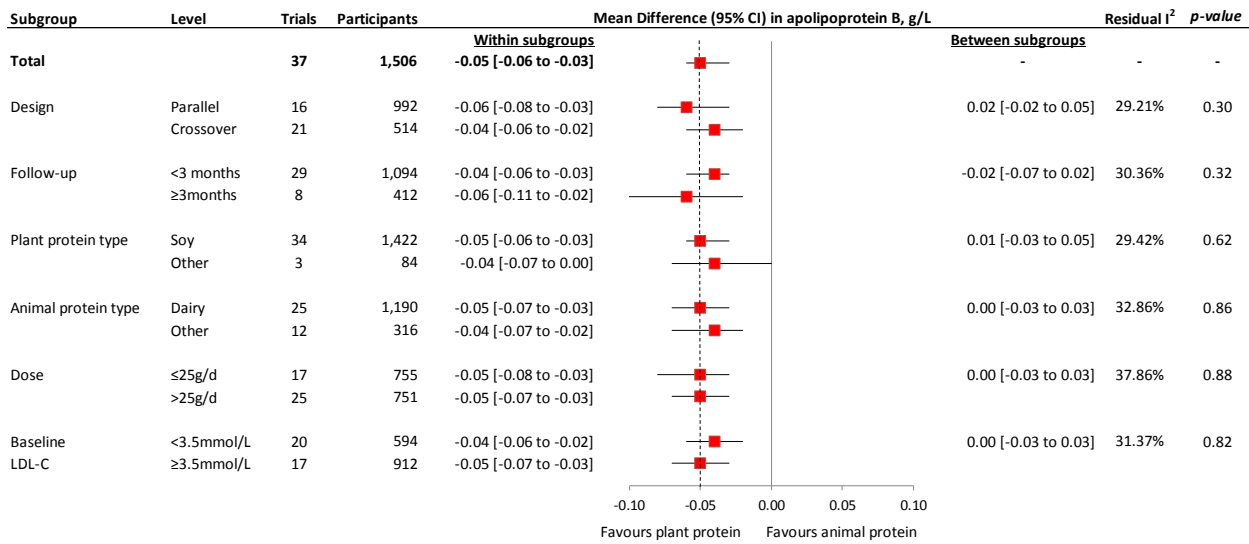

**Figure S11.** Apo-B Visual Subgroup. Point estimates for each subgroup level (squares) are the pooled effect estimates. The dashed line represents the pooled effect estimate for the overall (total) analysis. The residual  $I^2$  value indicates the interstudy heterogeneity unexplained by the subgroup. Statistically significant pairwise subgroup effect modification by meta-regression analyses at  $P < 0.05$ .

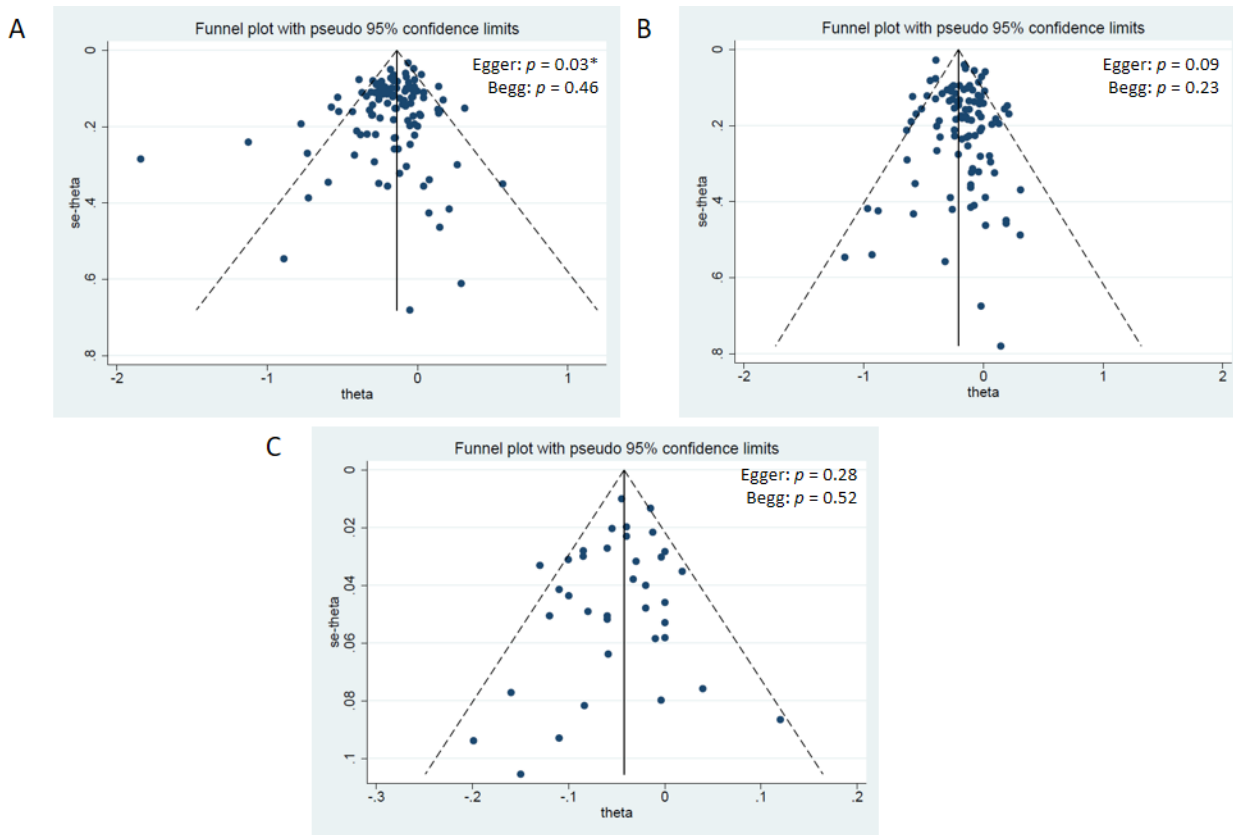

**Figure S12.** Funnel Plots. Publication bias funnel plots for LDL (A), non-HDL (B), and apolipoprotein B (C). The solid line represents the pooled effect estimate expressed as the weighted mean difference (MD) of each analysis, and dashed lines represent pseudo-95% confidence limits. Circles represent effect estimates of included trials. p-values of Egger and Begg tests for publication bias are shown at top right for each analysis. \*Statistically significant ( $p < 0.05$ ).

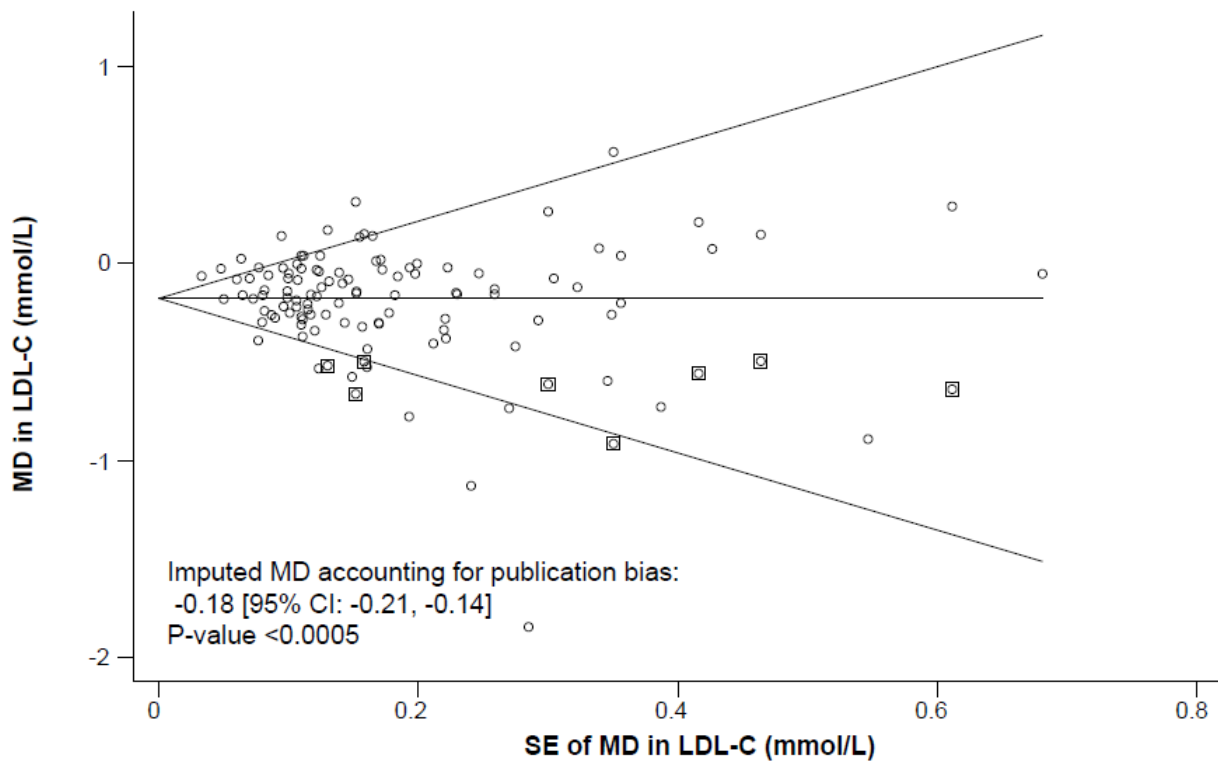

**Figure S13.** LDL-C Trim-And-Fill Funnel Plot. The horizontal line represents the pooled effect estimate expressed as a mean difference. The diagonal lines represent the pseudo 95% CIs of the mean difference. The clear circles represent effect estimates for each included study.

## Supplemental References

1. Abd-Mishani M, Hosseinpour-Niazi S, Delshad H, Bahadori-Monfared A, Mirmiran P, Azizi f. Effect of Modified Diet on Lipid Profiles in Type 2 Diabetic Patients. *Iranian Journal of Endocrinology and Metabolism* 2014;16:103-110.
2. Abete I, Parra D, Martinez JA. Legume-, fish-, or high-protein-based hypocaloric diets: effects on weight loss and mitochondrial oxidation in obese men. *J Med Food* 2009;12:100-8.
3. Ahmed MS, Calabria AC, Kirsztajn GM. Short-term effects of soy protein diet in patients with proteinuric glomerulopathies. *Jornal brasileiro de nefrologia : [MODIFIER LETTER PRIME]orgao oficial de Sociedades Brasileira e Latino-Americana de Nefrologia* 2011;33:150-9.
4. Allen JK, Becker DM, Kwiterovich PO, Lindenstruth KA, Curtis C. Effect of soy protein-containing isoflavones on lipoproteins in postmenopausal women. *Menopause (New York, NY)* 2007;14:106-14.
5. Appt SE, Tormala R, Franke AA, Mikkola TS, Tikkanen MJ, Ylikorkala O, Clarkson TB. Soy-tibolone combination - effect on lipids in postmenopausal monkeys and women. *Maturitas* 2008;60:216-22.
6. Ashton E, Ball M. Effects of soy as tofu vs meat on lipoprotein concentrations. *European journal of clinical nutrition* 2000;54:14-9.
7. Azadbakht L, Shakerhosseini R, Atabak S, Jamshidian M, Mehrabi Y, Esmail-Zadeh A. Beneficiary effect of dietary soy protein on lowering plasma levels of lipid and improving kidney function in type II diabetes with nephropathy. *European journal of clinical nutrition* 2003;57:1292-4.
8. Azadbakht L, Kimiagar M, Mehrabi Y, Esmailzadeh A, Padyab M, Hu FB, Willett WC. Soy inclusion in the diet improves features of the metabolic syndrome: a randomized crossover study in postmenopausal women. *The American Journal of Clinical Nutrition* 2007;85:735-741.
9. Azadbakht L, Atabak S, Esmailzadeh A. Soy protein intake, cardiorenal indices, and C-reactive protein in type 2 diabetes with nephropathy. *Diabetes Care* 2008;31:648-54.
10. Bähr M, Fechner A, Krämer J, Kiehntopf M, Jahreis G. Lupin protein positively affects plasma LDL cholesterol and LDL:HDL cholesterol ratio in hypercholesterolemic adults after four weeks of supplementation: a randomized, controlled crossover study. *Nutrition Journal* 2013;12:1-10.
11. Bähr M, Fechner A, Kiehntopf M, Jahreis G. Consuming a mixed diet enriched with lupin protein beneficially affects plasma lipids in hypercholesterolemic subjects: A randomized controlled trial. *Clinical Nutrition* 2014;34:7-14.
12. Bakhit RM, Klein BP, Essex-Sorlie D, Ham JO, Erdman JW, Jr., Potter SM. Intake of 25 g of soybean protein with or without soybean fiber alters plasma lipids in men with elevated cholesterol concentrations. *Journal of Nutrition* 1994;124:213-22.
13. Basaria S, Wisniewski A, Dupree K, Bruno T, Song MY, Yao F, Ojumu A, John M, Dobs AS. Effect of high-dose isoflavones on cognition, quality of life, androgens, and lipoprotein in post-menopausal women. *Journal of endocrinological investigation* 2009;32:150-5.
14. Baum JA, Teng H, Erdman JW, Weigel RM, Klein BP, Persky VW, Freels S, Surya P, Bakhit RM, Ramos E, Shay NF, Potter SM. Long-term intake of soy protein improves blood lipid profiles and increases mononuclear cell low-density-lipoprotein receptor messenger RNA in hypercholesterolemic, postmenopausal women. *The American Journal of Clinical Nutrition* 1998;68:545-51.
15. Beavers KM, Serra MC, Beavers DP, Hudson GM, Willoughby DS. The lipid-lowering effects of 4 weeks of daily soymilk or dairy milk ingestion in a postmenopausal female population. *Journal of medicinal food* 2010;13:650-6.
16. Blum A, Lang N, Peleg A, Vigder F, Israeli P, Gumanovsky M, Lupovitz S, Elgazi A, Ben-Ami M. Effects of oral soy protein on markers of inflammation in postmenopausal women with mild hypercholesterolemia. *American heart journal* 2003;145:e7.
17. Borodin EA, Menshikova IG, Dorovskikh VA, Feoktistova NA, Shtarberg MA, Yamamoto T, Takamatsu K, Mori H, Yamamoto S. Effects of two-month consumption of 30 g a day of soy protein isolate or skimmed curd protein on blood lipid concentration in Russian adults with hyperlipidemia. *Journal of nutritional science and vitaminology* 2009;55:492-7.

18. Bricarello LP, Kasinski N, Bertolami MC, Faludi A, Pinto LA, Relvas WG, Izar MC, Ihara SS, Tufik S, Fonseca FA. Comparison between the effects of soy milk and non-fat cow milk on lipid profile and lipid peroxidation in patients with primary hypercholesterolemia. *Nutrition (Burbank, Los Angeles County, Calif)* 2004;20:200-4.
19. Burns-Whitmore B, Haddad E, Sabaté J, Rajaram S. Effects of supplementing n-3 fatty acid enriched eggs and walnuts on cardiovascular disease risk markers in healthy free-living lacto-ovo-vegetarians: a randomized, crossover, free-living intervention study. *Nutrition Journal* 2014;13:1-9.
20. Campbell SC, Khalil DA, Payton ME, Arjmandi BH. One-year soy protein supplementation does not improve lipid profile in postmenopausal women. *Menopause* 2010;17:587-93.
21. Chen ST, Ferng SH, Yang CS, Peng SJ, Lee HR, Chen JR. Variable effects of soy protein on plasma lipids in hyperlipidemic and normolipidemic hemodialysis patients. *American journal of kidney diseases : the official journal of the National Kidney Foundation* 2005;46:1099-106.
22. Chen ST, Chen JR, Yang CS, Peng SJ, Ferng SH. Effect of soya protein on serum lipid profile and lipoprotein concentrations in patients undergoing hypercholesterolaemic haemodialysis. *The British journal of nutrition* 2006;95:366-71.
23. Crouse JR, 3rd, Morgan T, Terry JG, Ellis J, Vitolins M, Burke GL. A randomized trial comparing the effect of casein with that of soy protein containing varying amounts of isoflavones on plasma concentrations of lipids and lipoproteins. *Archives of Internal Medicine* 1999;159:2070-6.
24. Cuevas AM, Iribarra VL, Castillo OA, Yanez MD, Germain AM. Isolated soy protein improves endothelial function in postmenopausal hypercholesterolemic women. *European journal of clinical nutrition* 2003;57:889-94.
25. Dent SB, Peterson CT, Brace LD, Swain JH, Reddy MB, Hanson KB, Robinson JG, Alekel DL. Soy Protein Intake by Perimenopausal Women Does Not Affect Circulating Lipids and Lipoproteins or Coagulation and Fibrinolytic Factors. *The Journal of Nutrition* 2001;131:2280-2287.
26. Duane WC. Effects of soybean protein and very low dietary cholesterol on serum lipids, biliary lipids, and fecal sterols in humans. *Metabolism: Clinical & Experimental* 1999;48:489-94.
27. Dunn C, Liebman M. Plasma lipid alterations in vegetarian males resulting from the substitution of tofu for cheese. *Nutrition Research* 1986;6:1343-1352.
28. Finley JW, Burrell JB, Reeves PG. Pinto bean consumption changes SCFA profiles in fecal fermentations, bacterial populations of the lower bowel, and lipid profiles in blood of humans. *J Nutr* 2007;137:2391-8.
29. Gardner CD, Newell KA, Cherin R, Haskell WL. The effect of soy protein with or without isoflavones relative to milk protein on plasma lipids in hypercholesterolemic postmenopausal women. *The American journal of clinical nutrition* 2001;73:728-35.
30. Gardner CD, Messina M, Kiazand A, Morris JL, Franke AA. Effect of two types of soy milk and dairy milk on plasma lipids in hypercholesterolemic adults: a randomized trial. *Journal of the American College of Nutrition* 2007;26:669-77.
31. Giovannetti PM, Carroll KK, Wolfe BM. Constancy of fasting serum cholesterol of healthy young women upon substitution of soy protein isolate for meat and dairy protein in medium and low fat diets. *Nutrition Research* 1986;6:609-618.
32. Goldberg AP, Lim A, Kolar JB, Grundhauser JJ, Steinke FH, Schonfeld G. Soybean protein independently lowers plasma cholesterol levels in primary hypercholesterolemia. *Atherosclerosis* 1982;43:355-368.
33. Greany KA, Nettleton JA, Wangen KE, Thomas W, Kurzer MS. Probiotic Consumption Does Not Enhance the Cholesterol-Lowering Effect of Soy in Postmenopausal Women. *The Journal of Nutrition* 2004;134:3277-3283.
34. Haub MD, Wells AM, Campbell WW. Beef and soy-based food supplements differentially affect serum lipoprotein-lipid profiles because of changes in carbohydrate intake and novel nutrient intake ratios in older men who resistive-train. *Metabolism: clinical and experimental* 2005;54:769-74.
35. Hermansen K, Søndergaard M, Høie L, Carstensen M, Brock B. Beneficial Effects of a Soy-Based Dietary Supplement on Lipid Levels and Cardiovascular Risk Markers in Type 2 Diabetic Subjects. *Diabetes Care* 2001;24:228-233.
36. Hill AM, Harris Jackson KA, Roussel MA, West SG, Kris-Etherton PM. Type and amount of dietary protein in the treatment of metabolic syndrome: a randomized controlled trial. *Am J Clin Nutr* 2015;102:757-70.
37. Hoie LH, Morgenstern EC, Gruenwald J, Graubaum HJ, Busch R, Luder W, Zunft HJ. A double-blind placebo-controlled clinical trial compares the cholesterol-lowering effects of two different soy protein preparations in hypercholesterolemic subjects. *European journal of nutrition* 2005;44:65-71.



38. Høie LH, Graubaum H-J, Harde A, Gruenwald J, Wernecke K-D. Lipid-lowering effect of 2 dosages of a soy protein supplement in Hypercholesterolemia. *Advances in Therapy* 2005;22:175-186.
39. Hoie LH, Guldstrand M, Sjöholm A, Graubaum HJ, Gruenwald J, Zunft HJ, Lueder W. Cholesterol-lowering effects of a new isolated soy protein with high levels of nondenatured protein in hypercholesterolemic patients. *Advances in therapy* 2007;24:439-47.
40. Hosseinpour-Niazi S, Mirmiran P, Hedayati M, Azizi F. Substitution of red meat with legumes in the therapeutic lifestyle change diet based on dietary advice improves cardiometabolic risk factors in overweight type 2 diabetes patients: a cross-over randomized clinical trial. *Eur J Clin Nutr* 2015;69:592-597.
41. Huff MW, Giovannetti PM, Wolfe BM. Turnover of very low-density lipoprotein-apoprotein B is increased by substitution of soybean protein for meat and dairy protein in the diets of hypercholesterolemic men. *The American journal of clinical nutrition* 1984;39:888-97.
42. Jenkins DJA, Wolever TMS, Spiller G, Buckley G, Lam Y, Jenkins AL, Josse RG. Hypocholesterolemic effect of vegetable protein in a hypocaloric diet. *Atherosclerosis* 1989;78:99-107.
43. Jenkins DJ, Kendall CW, Jackson CJ, Connelly PW, Parker T, Faulkner D, Vidgen E, Cunnane SC, Leiter LA, Josse RG. Effects of high- and low-isoflavone soyfoods on blood lipids, oxidized LDL, homocysteine, and blood pressure in hyperlipidemic men and women. *The American journal of clinical nutrition* 2002;76:365-72.
44. Jenkins DJ, Srichaikul K, Wong JM, Kendall CW, Bashyam B, Vidgen E, Lamarche B, Rao AV, Jones PJ, Josse RG, Jackson CJ, Ng V, Leong T, Leiter LA. Supplemental barley protein and casein similarly affect serum lipids in hypercholesterolemic women and men. *The Journal of nutrition* 2010;140:1633-7.
45. Kestin M, Rouse IL, Correll RA, Nestel PJ. Cardiovascular disease risk factors in free-living men: comparison of two prudent diets, one based on lactoovovegetarianism and the other allowing lean meat. *Am J Clin Nutr* 1989;50:280-7.
46. Kjolbaek L, Sorensen LB, Sondertoft NB, Rasmussen CK, Lorenzen JK, Serena A, Astrup A, Larsen LH. Protein supplements after weight loss do not improve weight maintenance compared with recommended dietary protein intake despite beneficial effects on appetite sensation and energy expenditure: a randomized, controlled, double-blinded trial. *Am J Clin Nutr* 2017;106:684-697.
47. Kreijkamp-Kaspers S, Kok L, Grobbee DE, de Haan EH, Aleman A, Lampe JW, van der Schouw YT. Effect of soy protein containing isoflavones on cognitive function, bone mineral density, and plasma lipids in postmenopausal women: a randomized controlled trial. *JAMA : the journal of the American Medical Association* 2004;292:65-74.
48. Kurowska EM, Jordan J, Spence JD, Wetmore S, Piche LA, Radzikowski M, Dandona P, Carroll KK. Effects of substituting dietary soybean protein and oil for milk protein and fat in subjects with hypercholesterolemia. *Clinical & Investigative Medicine - Medecine Clinique et Experimentale* 1997;20:162-70.
49. Laidlaw M, Mercer NJH. Serum cholesterol, triglyceride and lipoprotein response in hypercholesterolemic males to replacement of cow's milk with a soy beverage. *Federation Proceedings*, 1985:6360.
50. Laurin D, Jacques H, Moorjani S, Steinke FH, Gagne C, Brun D, Lupien PJ. Effects of a soy-protein beverage on plasma lipoproteins in children with familial hypercholesterolemia. *The American journal of clinical nutrition* 1991;54:98-103.
51. Li J, Armstrong CL, Campbell WW. Effects of Dietary Protein Source and Quantity during Weight Loss on Appetite, Energy Expenditure, and Cardio-Metabolic Responses. *Nutrients* 2016;8:63.
52. Liao FH, Shieh MJ, Yang SC, Lin SH, Chien YW. Effectiveness of a soy-based compared with a traditional low-calorie diet on weight loss and lipid levels in overweight adults. *Nutrition (Burbank, Los Angeles County, Calif)* 2007;23:551-6.
53. Lichtenstein AH, Jalbert SM, Adlercreutz H, Goldin BR, Rasmussen H, Schaefer EJ, Ausman LM. Lipoprotein response to diets high in soy or animal protein with and without isoflavones in moderately hypercholesterolemic subjects. *Arteriosclerosis, Thrombosis & Vascular Biology* 2002;22:1852-8.
54. Liu ZM, Ho SC, Chen YM, Ho YP. The effects of isoflavones combined with soy protein on lipid profiles, C-reactive protein and cardiovascular risk among postmenopausal Chinese women. *Nutrition Metabolism & Cardiovascular Diseases* 2012;22:712-9.
55. Liu Z-m, Ho SC, Chen Y-m, Ho S, To K, Tomlinson B, Woo J. Whole soy, but not purified daidzein, had a favorable effect on improvement of cardiovascular risks: A 6-month randomized, double-blind, and placebo-controlled trial in equol-producing postmenopausal women. *Molecular Nutrition & Food Research* 2014;58:709-717.

56. Lovati MR, Manzoni C, Canavesi A, Sirtori M, Vaccarino V, Marchi M, Gaddi G, Sirtori CR. Soybean protein diet increases low density lipoprotein receptor activity in mononuclear cells from hypercholesterolemic patients. *J Clin Invest* 1987;80:1498-502.
57. Ma Y, Chiriboga D, Olendzki BC, Nicolosi R, Merriam PA, Ockene IS. Effect of soy protein containing isoflavones on blood lipids in moderately hypercholesterolemic adults: a randomized controlled trial. *Journal of the American College of Nutrition* 2005;24:275-85.
58. Ma L, Grann K, Li M, Jiang Z. A pilot study to evaluate the effect of soy isolate protein on the serum lipid profile and other potential cardiovascular risk markers in moderately hypercholesterolemic Chinese adults. *Ecology of Food & Nutrition* 2011;50:473-85.
59. Maki KC, Butteiger DN, Rains TM, Lawless A, Reeves MS, Schasteen C, Krul ES. Effects of soy protein on lipoprotein lipids and fecal bile acid excretion in men and women with moderate hypercholesterolemia. *Journal of clinical lipidology* 2010;4:531-42.
60. Markova MHS, Sucher S, Pivovarova O, Pfeiffer A. Metabolic and molecular effects of a high-protein diet in subjects with type 2 diabetes. *Diabetologia* 2015;58:S335.
61. Matthan NR, Jalbert SM, Ausman LM, Kuvin JT, Karas RH, Lichtenstein AH. Effect of soy protein from differently processed products on cardiovascular disease risk factors and vascular endothelial function in hypercholesterolemic subjects *Am J Clin Nutr.* 2007 Aug;86(2):525. *The American journal of clinical nutrition* 2007;85:960-6.
62. McVeigh BL, Dillingham BL, Lampe JW, Duncan AM. Effect of soy protein varying in isoflavone content on serum lipids in healthy young men. *The American journal of clinical nutrition* 2006;83:244-51.
63. Mercer NJH, Carroll KK, Giovannetti PM. Effects on human plasma lipids of substituting soybean protein isolate for milk protein in the diet. *Nutrition Reports International* 1987;35:279-287.
64. Meredith L, Liebman M, Graves K. Alterations in plasma lipid levels resulting from tofu and cheese consumption in adult women. *Journal of the American College of Nutrition* 1989;8:573-579.
65. Meyer BJ, Larkin TA, Owen AJ, Astheimer LB, Tapsell LC, Howe PR. Limited lipid-lowering effects of regular consumption of whole soybean foods. *Annals of nutrition & metabolism* 2004;48:67-78.
66. Miraghajani MS, Esmailzadeh A, Najafabadi MM, Mirlohi M, Azadbakht L. Soy Milk Consumption, Inflammation, Coagulation, and Oxidative Stress Among Type 2 Diabetic Patients With Nephropathy. *Diabetes Care* 2012;35:1981-1985.
67. Napora JK, Short RG, Muller DC, Carlson OD, Odetunde JO, Xu X, Carducci M, Trivison TG, Maggio M, Egan JM, Basaria S. High Dose Isoflavones do not improve Metabolic and Inflammatory Parameters in Androgen Deprived Men with Prostate Cancer. *Journal of andrology* 2011;32:40-48.
68. Onning G, Akesson B, Oste R, Lundquist I. Effects of consumption of oat milk, soya milk, or cow's milk on plasma lipids and antioxidative capacity in healthy subjects. *Annals of nutrition & metabolism* 1998;42:211-20.
69. Padhi EM, Blewett HJ, Duncan AM, Guzman RP, Hawke A, Seetharaman K, Tsao R, Wolever TM, Ramdath DD. Whole Soy Flour Incorporated into a Muffin and Consumed at 2 Doses of Soy Protein Does Not Lower LDL Cholesterol in a Randomized, Double-Blind Controlled Trial of Hypercholesterolemic Adults. *The Journal of Nutrition* 2015;145:2665-2674.
70. Pipe EA, Gobert CP, Capes SE, Darlington GA, Lampe JW, Duncan AM. Soy protein reduces serum LDL cholesterol and the LDL cholesterol:HDL cholesterol and apolipoprotein B:apolipoprotein A-I ratios in adults with type 2 diabetes. *The Journal of nutrition* 2009;139:1700-6.
71. Potter SM, Bakhit RM, Essex-Sorlie DL, Weingartner KE, Chapman KM, Nelson RA, Prabhudesai M, Savage WD, Nelson AI, Winter LW. Depression of plasma cholesterol in men by consumption of baked products containing soy protein. *The American Journal of Clinical Nutrition* 1993;58:501-6.
72. Puska P, Korpelainen V, Hoie LH, Skovlund E, Lahti T, Smerud KT. Soy in hypercholesterolaemia: a double-blind, placebo-controlled trial. *European journal of clinical nutrition* 2002;56:352-7.
73. Puska P, Korpelainen V, Hoie LH, Skovlund E, Smerud KT. Isolated soya protein with standardised levels of isoflavones, cotyledon soya fibres and soya phospholipids improves plasma lipids in hypercholesterolaemia: a double-blind, placebo-controlled trial of a yoghurt formulation. *The British journal of nutrition* 2004;91:393-401.
74. Roughead ZK, Hunt JR, Johnson LK, Badger TM, Lykken GI. Controlled substitution of soy protein for meat protein: effects on calcium retention, bone, and cardiovascular health indices in postmenopausal women. *Journal of Clinical Endocrinology & Metabolism* 2005;90:181-9.

75. Santo AS, Cunningham AM, Alhassan S, Browne RW, Burton H, Leddy JJ, Grandjean PW, Horvath SM, Horvath PJ. NMR analysis of lipoprotein particle size does not increase sensitivity to the effect of soy protein on CVD risk when compared with the traditional lipid profile. *Appl Physiol Nutr Metab* 2008;33:489-500.
76. Shidfar F, Ehrampshosh E, Heydari I, Haghghi L, Hosseini S, Shidfar S. Effects of soy bean on serum paraoxonase 1 activity and lipoproteins in hyperlipidemic postmenopausal women. *International Journal of Food Sciences and Nutrition* 2009;60:195-205.
77. Shige H, Ishikawa T, Higashi K, Yamashita T, Tomiyasu K, Yoshida H, Hosoi H, Ito T, Nakajima K, Ayaori M, Yonemura A, Suzukawa M, Nakamura H. Effects of soy protein isolate (SPI) and casein on the postprandial lipemia in normolipidemic men. *Journal of Nutritional Science & Vitaminology* 1998;44:113-27.
78. Sirtori CR, Agradi E, Conti F. Soybean protein diet in the treatment of type II hyperlipoproteinaemia. *Lancet* 1977;1:275-277.
79. Sirtori CR, Pazzucconi F, Colombo L, Battistin P, Bondioli A, Descheemaeker K. Double-blind study of the addition of high-protein soya milk v. cows' milk to the diet of patients with severe hypercholesterolaemia and resistance to or intolerance of statins. *The British journal of nutrition* 1999;82:91-6.
80. Sirtori CR, Bosisio R, Pazzucconi F, Bondioli A, Gatti E, Lovati MR, Murphy P. Soy Milk with a High Glycitein Content Does Not Reduce Low-Density Lipoprotein Cholesterol in Type II Hypercholesterolemic Patients. *Annals of Nutrition and Metabolism* 2002;46:88-92.
81. Steele MG. The effect on serum cholesterol levels of substituting milk with a soya beverage. *Australian Journal of Nutrition and Dietetics* 1992;49:24-8.
82. Steinberg FM, Guthrie NL, Villablanca AC, Kumar K, Murray MJ. Soy protein with isoflavones has favorable effects on endothelial function that are independent of lipid and antioxidant effects in healthy postmenopausal women. *The American journal of clinical nutrition* 2003;78:123-30.
83. Sucher S, Markova M, Hornemann S, Pivovarova O, Rudovich N, Thomann R, Schneeweiss R, Rohn S, Pfeiffer AFH. Comparison of the effects of diets high in animal or plant protein on metabolic and cardiovascular markers in type 2 diabetes: A randomized clinical trial. *Diabetes, obesity & metabolism* 2017;19:944-952.
84. Tabibi H, Imani H, Hedayati M, Atabak S, Rahmani L. EFFECTS OF SOY CONSUMPTION ON SERUM LIPIDS AND APOPROTEINS IN PERITONEAL DIALYSIS PATIENTS: A RANDOMIZED CONTROLLED TRIAL. *Peritoneal Dialysis International* 2010;30:611-618.
85. Takahira M, Noda K, Fukushima M, Zhang B, Mitsutake R, Uehara Y, Ogawa M, Kakuma T, Saku K. Randomized, Double-Blind, Controlled, Comparative Trial of Formula Food Containing Soy Protein vs. Milk Protein in Visceral Fat Obesity; FLAVO Study *Circulation Journal* 2011;75:2235-2243.
86. Teede HJ, Dalais FS, Kotsopoulos D, Liang YL, Davis S, McGrath BP. Dietary soy has both beneficial and potentially adverse cardiovascular effects: a placebo-controlled study in men and postmenopausal women. *Journal of Clinical Endocrinology & Metabolism* 2001;86:3053-60.
87. Teixeira SR, Potter SM, Weigel R, Hannum S, Erdman JW, Hasler CM. Effects of feeding 4 levels of soy protein for 3 and 6 wk on blood lipids and apolipoproteins in moderately hypercholesterolemic men. *The American journal of clinical nutrition* 2000;71:1077-84.
88. Teixeira SR, Tappenden KA, Carson L, Jones R, Prabhudesai M, Marshall WP, Erdman JW. Isolated soy protein consumption reduces urinary albumin excretion and improves the serum lipid profile in men with type 2 diabetes mellitus and nephropathy. *The Journal of nutrition* 2004;134:1874-80.
89. Thorp AA, Howe PR, Mori TA, Coates AM, Buckley JD, Hodgson J, Mansour J, Meyer BJ. Soy food consumption does not lower LDL cholesterol in either equol or nonequol producers. *The American journal of clinical nutrition* 2008;88:298-304.
90. Tonstad S, Smerud K, Hoie L. A comparison of the effects of 2 doses of soy protein or casein on serum lipids, serum lipoproteins, and plasma total homocysteine in hypercholesterolemic subjects. *American Journal of Clinical Nutrition* 2002;76:78-84.
91. Van Horn L, Liu K, Gerber J, Garside D, Schiffer L, Gernhofer N, Greenland P. Oats and soy in lipid-lowering diets for women with hypercholesterolemia: is there synergy? *Journal of the American Dietetic Association* 2001;101:1319-25.
92. van Nielen M, Feskens EJM, Rietman A, Siebelink E, Mensink M. Partly Replacing Meat Protein with Soy Protein Alters Insulin Resistance and Blood Lipids in Postmenopausal Women with Abdominal Obesity. *The Journal of Nutrition* 2014;144:1423-1429.

93. van Raaij JM, Katan MB, Hautvast JG, Hermus RJ. Effects of casein versus soy protein diets on serum cholesterol and lipoproteins in young healthy volunteers. *The American journal of clinical nutrition* 1981;34:1261-71.
94. van Raaij JM, Katan MB, West CE, Hautvast JG. Influence of diets containing casein, soy isolate, and soy concentrate on serum cholesterol and lipoproteins in middle-aged volunteers. *The American Journal of Clinical Nutrition* 1982;35:925-34.
95. Vega-Lopez S, Matthan NR, Ausman LM, Harding SV, Rideout TC, Ai M, Otokozawa S, Freed A, Kuvin JT, Jones PJ, Schaefer EJ, Lichtenstein AH. Altering dietary lysine:arginine ratio has little effect on cardiovascular risk factors and vascular reactivity in moderately hypercholesterolemic adults. *Atherosclerosis* 2010;210:555-62.
96. Vigna GB, Pansini F, Bonaccorsi G, Albertazzi P, Donega P, Zanotti L, De Aloysio D, Mollica G, Fellin R. Plasma lipoproteins in soy-treated postmenopausal women: a double-blind, placebo-controlled trial. *Nutrition Metabolism & Cardiovascular Diseases* 2000;10:315-22.
97. Weisse K, Brandsch C, Zernsdorf B, Nkengfack Nembongwe GS, Hofmann K, Eder K, Stangl GI. Lupin protein compared to casein lowers the LDL cholesterol:HDL cholesterol-ratio of hypercholesterolemic adults. *European journal of nutrition* 2010;49:65-71.
98. West SG, Hilpert KF, Juturu V, Bordi PL, Lampe JW, Mousa SA, Kris-Etherton PM. Effects of including soy protein in a blood cholesterol-lowering diet on markers of cardiac risk in men and in postmenopausal women with and without hormone replacement therapy. *Journal of Women's Health* 2005;14:253-262.
99. Wheeler ML, Fineberg SE, Fineberg NS, Gibson RG, Hackward LL. Animal versus plant protein meals in individuals with type 2 diabetes and microalbuminuria: effects on renal, glycemic, and lipid parameters. *Diabetes Care* 2002;25:1277-1282.
100. Wiebe SL, Bruce VM, McDonald BE. A comparison of the effect of diets containing beef protein and plant proteins on blood lipids of healthy young men. *The American journal of clinical nutrition* 1984;40:982-9.
101. Wofford MR, Rebholz CM, Reynolds K, Chen J, Chen CS, Myers L, Xu J, Jones DW, Whelton PK, He J. Effect of soy and milk protein supplementation on serum lipid levels: A randomized controlled trial. *European Journal of Clinical Nutrition* 2012;66:419-425.
102. Wolfe BM, Giovannetti PM, Cheng DCH. Hypolipidemic effect of substituting soybean protein isolate for all meat and dairy protein in the diets of hypercholesterolemic men. *Nutrition Reports International* 1981;24:1187-1198.
103. Wolfe BM, Giovannetti PM. Elevation of VLDL-cholesterol during substitution of soy protein for animal protein in diets of hypercholesterolemic Canadians. *Nutrition Reports International* 1985;32:1057-1065.
104. Wong WW, Smith EO, Stuff JE, Hachey DL, Heird WC, Pownell HJ. Cholesterol-lowering effect of soy protein in normocholesterolemic and hypercholesterolemic men. *American Journal of Clinical Nutrition* 1998;68:1385S-1389S.
